## PRIMER

# The diverse neural crest: from embryology to human pathology

Heather C. Etchevers<sup>1,\*</sup>, Elisabeth Dupin<sup>2</sup> and Nicole M. Le Douarin<sup>2,\*</sup>

## ABSTRACT

We review here some of the historical highlights in exploratory studies of the vertebrate embryonic structure known as the neural crest. The study of the molecular properties of the cells that it produces, their migratory capacities and plasticity, and the still-growing list of tissues that depend on their presence for form and function, continue to enrich our understanding of congenital malformations, paediatric cancers and evolutionary biology. Developmental biology has been key to our understanding of the neural crest, starting with the early days of experimental embryology and through to today, when increasingly powerful technologies contribute to further insight into this fascinating vertebrate cell population.

**KEY WORDS:** Cell fate, Neural crest, Neurocristopathies, Vertebrate embryo

## Introduction

Wilhelm His is credited with the first description of the neural crest (NC), from careful observations of chick embryos under the microscopes of the era. He had noticed, on the dorsal side of the closing neural tube, the formation of a cord of cells lying between the superficial ectoderm and the underlying neural tube, which he called *Zwischenstrang* (intermediate cord) (His, 1868). His described cells emerging from it, gliding over the surface of the neural tube, aggregating laterally and forming the spinal ganglia. The initial area at which the lateral edges of the neural plate folded and adjoined was therefore first called the ‘ganglionic crest’. Later, Arthur Milnes Marshall introduced the term ‘neural crest’ as ‘a continuous longitudinal band, which grows out along the mid-dorsal line of the spinal cord’ (Marshall, 1878). His’ discovery, although not readily accepted at that time by his colleagues, was of great significance, as will be shown in this overview of what turned out to be a major component of the vertebrate embryo.

The reason why the NC had been mostly ignored by most embryologists for the half century before His was its cardinal characteristic, which is to be transitory. The NC population forms, depending on the species, approximately when the lateral borders of the neural plate (also called the ‘neural folds’) join dorsally to close the neural tube. Thereafter, NC cells undergo an epithelial-to-mesenchymal transition, migrate away from their source to invade the entire developing embryo, and settle in selected sites, at which they develop into a large variety of cell types. As they disperse, NC cells are usually indistinguishable from those of the embryonic tissues

through which they move. Our knowledge of the fate and contributions of NC cells to the vertebrate body was acquired using various experimental strategies – in numerous model systems – that complemented earlier observational studies that were initiated by His.

This review will first provide a historical overview of the progressive acquisition of our knowledge of the NC, starting with how the NC came to be recognized as a unique structure in the vertebrate embryo. We then cover ablation and cell tracking experiments that gave the initial insights into NC cell fate and contributions. From the late 1960s onward, the avian model was the subject of intensive studies through the construction of chimeric embryos, but the NC was also extensively studied in other vertebrates, in particular fish and amphibians. We describe how the highly diversified derivatives of the NC spurred investigation into the multipotency of individual NC cells, and how *in vitro* analyses revealed the existence of NC stem cells. Remarkable genetic advances in mice then made it possible to tackle the problem of NC fates and migration routes in mammals. Together with the fundamental knowledge that emerged from the studies on non-mammalian species, this more recent approach is having an important impact on our interpretation and understanding of many human pathologies that are attributable to abnormal development or function of NC derivatives. This subject will be discussed in the last part of this review.

In choosing such a story, we necessarily omit much important work. Functional genetics and *in vivo* live imaging in *Xenopus*, zebrafish and chick were instrumental in deciphering the cellular and molecular mechanisms of NC cell delamination and migration; we refer readers to other reviews for further information (Ahlstrom and Erickson, 2009; McKinney et al., 2013; McLennan et al., 2015; Theveneau and Mayor, 2012; and references therein). A large body of work has unveiled how signals and regulatory genes control the acquisition of the distinct fates of NC cells (recently reviewed by Baster et al., 2018; Bhatt et al., 2013; Uesaka et al., 2016). Finally, an important breakthrough in NC biology was the molecular analysis, mainly in chick and *Xenopus*, of the gene regulatory

### Advocating developmental biology

This article is part of Development’s advocacy collection – a series of review articles which make compelling arguments for the field’s importance. The series is split into two: one set of articles, including this one, addresses the question ‘What has developmental biology ever done for us?’ We want to illustrate how discoveries in developmental biology have had a wider scientific and societal impact, and thus both celebrate our field’s history and argue for its continuing place as a core biological discipline. In a complementary set of articles, we asked authors to explore ‘What are the big open questions in the field?’ Together, the articles will provide a collection of case studies looking backwards to the field’s achievements and forwards to its potential, a resource for students, educators, advocates and researchers alike. To see the full collection as it grows, go to <http://dev.biologists.org/content/advocating-developmental-biology>.

<sup>1</sup>Aix-Marseille Université, INSERM, MMG, U1251, 27 boulevard Jean Moulin 13005 Marseille, France. <sup>2</sup>Sorbonne Universités, UPMC Paris 06, INSERM, CNRS, Institut de la Vision, 17 rue Moreau, 75012 Paris, France.

\*Authors for correspondence (nicole.ledouarin@academie-sciences.fr; heather.etchevers@inserm.fr)

 H.C.E., 0000-0003-0201-3799; E.D., 0000-0003-0287-0256; N.M.L.D., 0000-0003-4071-9418

networks that are involved in the individualization of this neural structure, which took place at the turn of the 21st century (Bae et al., 2014; Buitrago-Delgado et al., 2015; Martik and Bronner, 2017; Millet et al., 2013; Plouhinec et al., 2013). We hope readers find these articles complementary to our overview.

### Recognition of the neural crest as a distinct embryonic structure

Owing to the transitory nature of the NC and the extensive migration of its constituent cells, the existence of the NC as a distinct embryonic structure was, for many decades, the subject of active controversy. It took more than eighty years to settle the debate, when Sven Hörstadius stated in his landmark monograph that ‘it seems clearly established today [in 1950] that the neural crest forms a special rudiment already present in the open neural plate stage’ (Hörstadius, 1950).

As mentioned above, His’ views were not widely adopted by the embryologists of that time. Among others, Francis Maitland Balfour (Balfour, 1881; Balfour and Foster, 1876) and Nikolai Feofanovich Kastschenko (1888) thought that spinal nerves were outgrowths of the spinal cord and not produced by the NC; moreover, it was assumed that the spinal ganglia originated from the myotomes (and hence were mesodermal in origin). Given this, it is curious to note that the capacity of this ectodermal structure to yield mesenchymal cells was one of the first NC derivatives to be readily identified, using a fish model. The same Kastschenko, working on selachian development, concluded that some of the head mesenchyme originated from the cephalic NC, whereas Nikolaus Goronowitsch (1892, 1893) recognized, from his studies on teleost embryos, that the cephalic NC provided the head with skeletogenic mesenchyme. However, this author denied an NC origin for the spinal ganglia.

The intense debates that were generated by these discrepancies could have been resolved by the work of Julia Platt (1893, 1897). She found that, as well as cranial ganglia and nerves, the NC gave rise to mesenchymal cells, including the cells that contribute to the bones and cartilage of the visceral arches and that produce the dentine of the teeth. She even created the term mesectoderm for the mesenchyme of ectodermal origin that she distinguished from the mesentoderm, which is derived from the mesodermal germ layer. These conclusions, drawn by one of the rare women that was involved in science at that time, were hardly recognized, and further investigations in other vertebrate species by different authors did not help to clarify the debate: some supported, whereas others refuted, that mesenchymal cells could be produced by the ectoderm (e.g. Holmdahl, 1928; Landacre, 1921; Stone, 1922).

The roots of this controversy grew out of Karl Ernst von Baer’s ‘germ layer theory’ (von Baer, 1828), according to which homologous structures within the same animal and across different animals must be derived from material that belongs to the same germ layer (ectoderm, mesoderm or endoderm). Mesenchymal (loose) cells, and specifically the skeletal tissues that differentiate from them, could thus arise only from mesoderm. It was only in the 1920s that observations associated with experimental work in amphibian embryos (Landacre, 1921; Stone, 1922, 1926) convinced the scientific community that a proportion of mesenchymal cells of the vertebrate embryo are ectodermally derived via the NC.

### Following the migration of neural crest cells and discovering their fate

Destruction or microsurgical removal of the neural tube or neural folds *in situ* was widely used in the early twentieth century and provided some fundamental knowledge for the identification of

some NC derivatives and their origin along the neural axis (Dushane, 1938). However, extirpation of embryonic territories at early stages can sometimes trigger regenerative responses, which are able to compensate for certain types of ablations. Thus, this approach can establish that a primordium is necessary for the formation of a given structure, but not that it contributes directly to its tissues.

Labelling distinct regions of the neural primordium *in situ* with vital dyes (such as Nile Blue or Nile Red, which coloured but did not poison cells) enabled and confirmed important discoveries that were initiated by ablation approaches. For example, in addition to the spinal ganglia, NC cells were shown to be involved in the production of pigment cells and the cells that line nerves throughout the entire peripheral nervous system (PNS), as well as contributing to the teeth and to the dorsal fin in fish (Dushane, 1938; Twitty and Bodenstern, 1941). This technique was not entirely reliable owing to dye diffusion over time, but there were good examples of its efficacy, such as the thorough studies that were performed by Hörstadius and Sellman (1941, 1946) on the contribution of NC cells to amphibian pharyngeal arch cartilage.

Another means of tracking cells through development was by constructing embryonic chimeras via cell or tissue transplantation between two distinct embryos; the great potential of this technique was unravelled in amphibian species. Christiaan Pieter Raven (1931) was the first to trace the fate of NC cells by exchanging defined fragments of the neural folds between two distinct species: *Triturus* (a salamander) and *Ambystoma* (the axolotl). The identification of host versus donor cells, based solely on differences in the size of their nucleus, was highly labour-intensive and imprecise (single cell resolution was not possible). Nonetheless, this method permitted recognition of the origin of populations of cells in chimeric tissues, and thanks to it the NC origin of dental papillae – the mesenchyme below each tooth bud that gives rise to dentine and pulp – was discovered in amphibians (Raven, 1935) nearly 70 years before its confirmation in mammals.

Lineage tracing made significant progress through the use of autoradiography to detect tritiated ( $^3\text{H}$ )-thymidine that was incorporated into dividing neuroepithelial cells after injection into the brain (Sauer and Walker, 1959, in chick; Sidman et al., 1959, in mouse). This technique allowed grafts of defined neural territories that had been labelled in a donor embryo to be implanted in an unlabelled recipient of the same species. Jim Weston (1963), and later Malcolm (Mac) Johnston (1966) and Drew Noden (1975), used the approach to follow the migration of chicken NC cells, whereas Pierre Chibon (1964, 1967) applied it in *Pleurodeles*, a salamander. Although such labelling suffers a few major limitations, including instability and toxicity, several important results can be credited to it, such as the confirmation of the NC origin of spinal and sympathetic ganglia and of pigment cells (Weston, 1963). The derivation of Schwann cells from a mesodermal source was definitively excluded, and Schwann cells were recognized as NC-derived. By implanting  $^3\text{H}$ -thymidine-labelled *Pleurodeles* NC cells into an unlabelled host, Chibon (1967) confirmed the NC origin of major components of the head skeleton, as did Johnston (1966) in the chick.

### Quail-chick chimeras led to a comprehensive avian neural crest fate map

The quail-chick marking system provided a means to study the development of the NC in amniotes, which had not been used as often in experimental embryology as amphibians or fish had been. It was designed by one of us (Le Douarin, 1969) following the

observation that cells of the quail (*Coturnix coturnix japonica*) could be readily distinguished from those of the chick by the structure of their nucleus. Quail nuclei at all life stages have a large nucleolus, which is caused by a mass of heterochromatin that is associated with the nucleolus. This particularity is rare in the animal kingdom (Le Douarin, 1971a) and does not exist in the chick (Le Douarin, 1969, 1971b). When quail cells are transplanted into a chick embryo or associated with chick tissues *in vitro*, the cells of each species retain their nuclear characteristics and can be readily distinguished at the single cell level in chimeric tissues using the Feulgen-Rossenbeck histological nuclear stain, provided that the section includes the nucleolus (Le Douarin, 1973). A significant improvement in cell identification in these chimeras occurred with the production of monoclonal antibodies that recognized species-specific antigens. The antibody against a peri-nuclear antigen, QCPN (Quail non-Chick Peri-Nuclear), which was prepared by Bruce and Jean Carlson, turned out to be particularly useful from the mid-1990s onward.

Avian NC cell fates were systematically investigated by constructing chimeras in which a fragment of the neural tube (or neural fold at the head level) of a chick embryo was removed before the onset of NC cell emigration, and replaced by its exact staged counterpart from a quail embryo (reciprocal chick-to-quail grafts were initially performed to validate the approach). The stability of cell labelling allowed researchers to follow migration and fate of NC cells during the entire incubation period and even for a time after birth (Teillet and Le Douarin, 1970; Kinutani and Le Douarin, 1985). Such experiments were effective in determining which cell types came from the avian NC, and from which axial levels of the neural primordium (Le Douarin, 1982; Le Douarin and Kalcheim, 1999) (Table 1). Together, they provided a fate map of NC cells regarding the production of mesenchymal cells, pigment cells and the sensory, autonomic and enteric components of the PNS (Fig. 1).

The contribution of the NC to cephalic structures was, for the first time, fully demonstrated (Le Lièvre and Le Douarin, 1975; reviewed by Le Douarin and Kalcheim, 1999), and new endocrine

derivatives, such as the carotid body and the calcitonin-producing cells of the ultimobranchial body, were identified (Le Douarin and Le Lièvre, 1970; Le Douarin et al., 1972, 1974; Pearse et al., 1973; Polak et al., 1974). Regarding the origin of the PNS, defined regions of the spinal cord and posterior hindbrain were found to be dedicated to producing the sympathetic, parasympathetic or enteric ganglia (Fig. 1). For example, the so-called ‘vagal’ level of the NC, which corresponds to the emergence of the vagus nerve between the axial levels of somites 1 to 7, provides the entire gut with the two plexuses of the enteric nervous system (ENS), the neurons of which become cholinergic (Le Douarin and Teillet, 1973). Some of the vagal NC cells (from pre-somitic levels to somite 3) also contribute to the perivascular walls of the posterior pharyngeal arteries and septation of the cardiac outflow tract (Arima et al., 2012; Kirby et al., 1983; Le Lièvre and Le Douarin, 1975) (Fig. 2). Such work also showed that both pre- and postganglionic neurons of the ENS originate from the same level of the neural axis, whereas the lumbo-sacral NC provides an additional contribution to the posterior ENS (Burns and Le Douarin, 1998; Le Douarin and Teillet, 1973; Yntema and Hammond, 1955) (Fig. 1). The adreno-medullary NC, which is located between somites 18 and 24 in the chick embryo (at the level of and immediately posterior to the forelimb), produces the adrenaline- and noradrenaline-producing cells of the adrenal gland, together with the sympathetic ganglia that correspond to this axial level, but it makes no contribution to the ENS (Le Douarin and Teillet, 1974).

These observations raised the question of whether neuronal precursors were pre-committed along the neural axis (i.e. vagal to cholinergic neurons and adreno-medullary to adrenergic neurons), or whether they received inductive signals on their journey and/or at their site of arrest. When vagal NC was transplanted posteriorly to the adreno-medullary level (and vice versa), the PNS developed normally, showing that neuronal precursors were not pre-committed. Rather, their final phenotype is regulated by external cues that act at their site of arrest and possibly also during the course of their migration. This experiment was the first to demonstrate that

**Table 1. Derivatives of the NC**

|             | Cell types                                                                                                                                                                                                                                     |                                                                                                                            |                                                                                     |                                                                                                                                                                                                                                                                                                                                                                                                                                                                                       |
|-------------|------------------------------------------------------------------------------------------------------------------------------------------------------------------------------------------------------------------------------------------------|----------------------------------------------------------------------------------------------------------------------------|-------------------------------------------------------------------------------------|---------------------------------------------------------------------------------------------------------------------------------------------------------------------------------------------------------------------------------------------------------------------------------------------------------------------------------------------------------------------------------------------------------------------------------------------------------------------------------------|
|             | Neurons and glial cells                                                                                                                                                                                                                        | Pigment cells                                                                                                              | Endocrine cells                                                                     | Mesenchymal cells                                                                                                                                                                                                                                                                                                                                                                                                                                                                     |
| CEPHALIC NC | Sensory cranial ganglionic neurons<br>Parasympathetic (e.g. ciliary) ganglionic neurons<br>Enteric ganglionic neurons<br>Schwann cells along PNS nerves<br>Satellite glial cells in PNS ganglia<br>Enteric glia<br>Olfactory ensheathing cells | Skin melanocytes<br>Inner ear and choroid melanocytes<br>Other extracutaneous melanocytes (in gums, meninges, heart, etc.) | Carotid body glomus cells<br>Calcitonin-producing cells of the ultimobranchial body | Cranio-facial skeleton<br>Dermal bone osteocytes<br>Endochondral osteocytes<br>Chondrocytes<br>Myofibroblasts, smooth muscle cells and pericytes (cardiac outflow tract and pharyngeal arch-derived blood vessels)<br>Meninges (forebrain)<br>Cornea endothelial and stromal cells<br>Ciliary muscles/anterior segment of the eye<br>Adipocytes<br>Facial dermis<br>Connective cells of glands, muscles and tendons<br>Odontoblasts, cells of periodontal ligament and tooth papillae |
| TRUNK NC    | Sensory (dorsal root) ganglionic neurons<br>Sympathetic ganglionic neurons<br>Parasympathetic ganglionic neurons<br>Satellite glial cells in PNS ganglia<br>Schwann cells along PNS nerves                                                     | Skin melanocytes                                                                                                           | Adrenal medullary cells                                                             |                                                                                                                                                                                                                                                                                                                                                                                                                                                                                       |

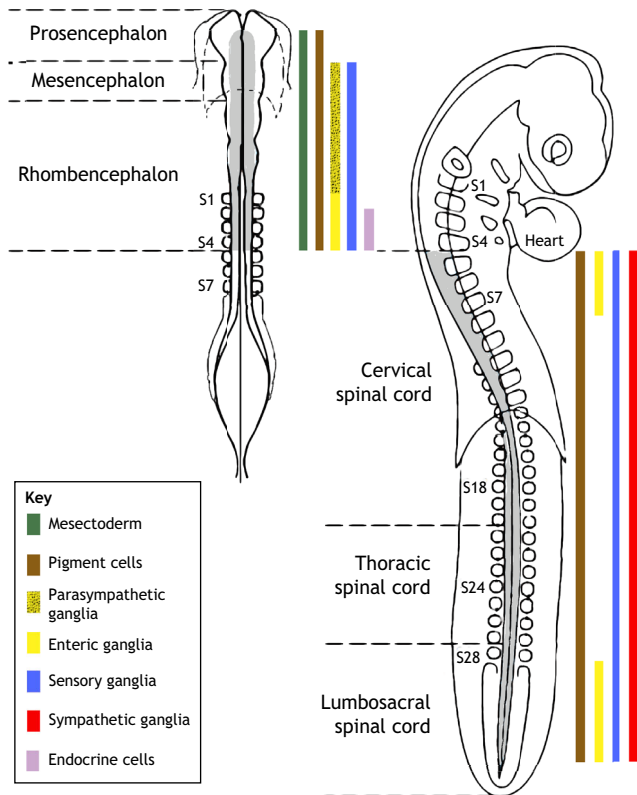

**Fig. 1. Fate map of NC derivatives.** Representations of chicken embryos at 7 (left) and 28 (right) somite pairs (S), with neural folds that are capable of generating NC cells in grey and colours indicating the axial levels from which different classes of NC derivatives originate. Adapted from Le Douarin et al., 2004.

the differentiation of neurons is dependent upon signals that are received from their environment (Le Douarin and Teillet, 1974; Le Douarin et al., 1975), one example out of many in which specific insights about the NC have had broad implications for our understanding of how development works.

### Decisive contribution of mouse genetics to the knowledge of the mammalian neural crest

Embryonic manipulation is technically challenging in mammals, and access to rat and mouse embryos of postimplantation stages required the development of whole-embryo culture techniques. Thereafter, focal dye labelling, cell microinjection and perturbation experiments all provided insightful information on the migration of mammalian NC cells (Osumi-Yamashita et al., 1994; Serbedzija et al., 1990, 1992; Takakubo et al., 1986; Tan and Morriss-Kay, 1986). These data, however, were limited to early NC developmental stages owing to the short period of survival of cultured embryos.

More recently, genetic approaches in mice that rely on the specificity of regulatory elements to drive gene expression in a given tissue and at a given moment of development have facilitated long-term mammalian lineage tracing. Conditional site-specific recombination was as beneficial to the study of the NC as it was to developmental biology as a whole. This was first achieved by combining an allele that drives the expression of a bacteriophage-derived *Cre* recombinase with an allele that contains a *loxP*-flanked (floxed) sequence to be excised in the target cell (Sauer and Henderson, 1988). A particularly influential transgene construction, which was devised by Andy McMahon and colleagues, contains enhancers that drive *Wnt1* gene expression in the murine dorsal

neural tube and, thereby, in the premigratory NC (Danielian et al., 1998). One mouse line that was developed from this construct (commonly known as *Wnt1-Cre*) was particularly useful for the recognition of mammalian NC derivatives. Although some species-specific differences were observed, most derivatives of the NC were similar in mouse and avian species. *Wnt1-Cre*-labelled NC cells contributed to head skeletal elements, ocular and periocular tissues, teeth and the palate (Chai et al., 2000; Gage et al., 2005; Jiang et al., 2002; Matsuoka et al., 2005); the cardiac outflow tract, tricuspid valves and surrounding tissues (e.g. El Robrini et al., 2016; Jiang et al., 2000); and the skin, at the level of innervated hair follicles and glands (Wong et al., 2006). An advantage of *Wnt1-Cre*-driven recombination was that it enabled permanent expression of traceable genetic markers such as *lacZ*, allowing new (often late) sites of NC colonization to be identified, such as the marrow of adult long bones (Nagoshi et al., 2008).

However, this genetic system has drawbacks: the *Wnt1-Cre* allele also activates ectopic Wnt signalling in the ventral midbrain, perhaps because of the confounding genomic rearrangements that are induced by insertion of the transgene (Goodwin et al., 2017 preprint; Lewis et al., 2013). Other *Cre* lines have been developed to target some or most NC cells and examine distinct aspects of their development: *Sox10-Cre*, *htPA-Cre* and *P0-Cre* label migratory rather than premigratory NC cells, for example (Matsuoka et al., 2005; Pietri et al., 2003; Yamauchi et al., 1999). Additional advantages of the *Cre-lox* system, which has been largely exploited over the last 15 years, have been to combine such analyses of lineage tracing with the responses of the same cells to genetic gain- or loss-of-function or to modulate the timing of *Cre* expression, but we will leave the exploration of these many recent studies to our readers' diligence.

### The neural crest and the vertebrate head

The above-described experimental approaches illuminated the remarkable range of NC-derived tissues and organs in the head. The role of the mesectoderm was found to be quantitatively far more important for head development than had been previously thought before the 1970s (Fig. 2). Tissues of NC origin in the head are not only skeletogenic for the entire facial skull, inner ear and rostral brain case, but also include soft tissues such as the dermis, fascia and tendons of the facial and ocular muscles, the interstitial cells in all head and neck glands examined, and the adipocytes of the face and neck (Billon et al., 2007; Couly et al., 1993; Grenier et al., 2009; Le Lièvre and Le Douarin, 1973, 1975; Noden, 1978) (Table 1). Strikingly, the striated myocytes of avian iris muscles (Nakano and Nakamura, 1985), and the ciliary bodies and the corneal endothelium and stroma, are all specialized derivatives of the cephalic NC in both chicken (Creuzet et al., 2005; Johnston et al., 1979) and mouse (Gage et al., 2005).

Cephalic NC cells are also the source of vascular smooth muscle cells and pericytes in a restricted area of the circulatory system (Fig. 2). This 'branchial' sector extends distally from the cardiac outflow tract, the septation of which depends on the presence of NC cells (Kirby et al., 1983; Le Lièvre and Le Douarin, 1975; Waldo et al., 1998), along arteries and jugular veins to the distal capillary beds and choroid plexuses of the face and forebrain (Bergwerff et al., 1998; Couly and Le Douarin, 1987; Etchevers et al., 1999; Etchevers et al., 2001). In the forebrain, NC cells give rise to pericytes and to meninges (dura mater and pia mater), although not to associated vascular endothelium (Couly and Le Douarin, 1987; Etchevers et al., 1999; Le Lièvre and Le Douarin, 1975), an observation that was later borne out in mice (Jiang et al., 2002).

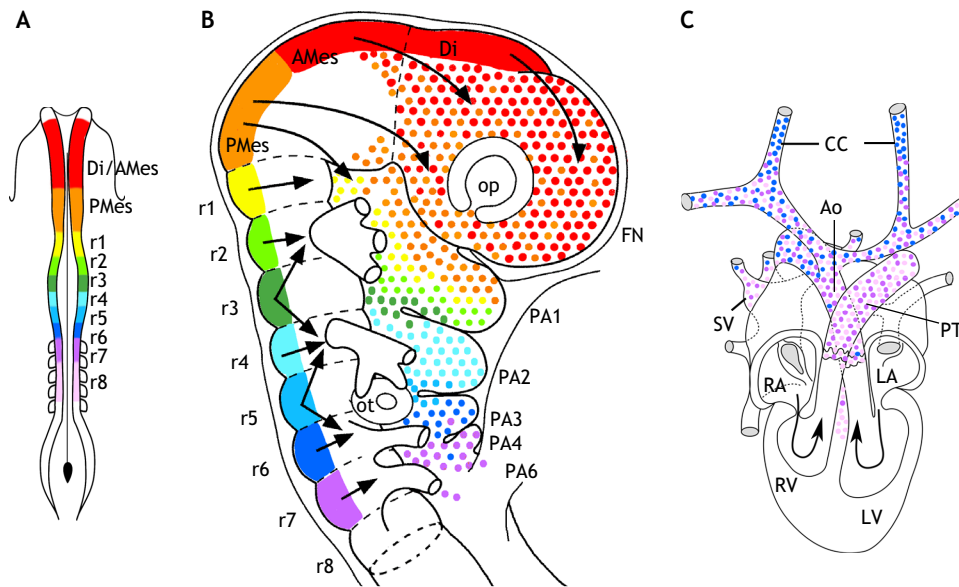

**Fig. 2. Migration of the cephalic NC cells to the craniofacial and cardiac regions.** (A) Schematic dorsal view of chicken embryo with five somite pairs, at ~30 h incubation. Colours represent original levels of NC cells in the neural folds before migration. Adapted from Couly et al., 1996. (B) Stylized right view of chicken embryo at embryonic day (E) 3.5, showing NC cell migration pathways in the craniofacial and branchial arch mesenchyme. Adapted from Couly et al., 1998. (C) Distribution at E8 of NC cells from rhombomeres 6-8 in cardiac outflow tract, including the tricuspid valves of aortic and pulmonary trunks, as well as pericytes and smooth muscle of blood vessels derived from pharyngeal arches 3-6. Adapted from Etchevers et al., 2001. AMes, anterior mesencephalon; Ao, aorta; CC, common carotid arteries; Di, diencephalon; FN, frontonasal bud; LA, left atrium; LV, left ventricle; op, optic vesicle; ot, otic vesicle; PA1-6, pharyngeal arches 1-6 (by convention, there is no PA5 in amniotes); PMes, posterior mesencephalic NC; PT, pulmonary trunk; r1-8, rhombomeres 1-8; RA, right atrium; RV, right ventricle; SV, sinus venosus.

In contrast, both meninges and pericytes are of mesodermal origin in all other parts of the brain and spinal cord (Couly et al., 1992, 1995; Pouget et al., 2008).

The embryological results that uncovered the paramount role of the NC cells in building various head tissues, together with other considerations, led Carl Gans and R. Glenn Northcutt (Gans and Northcutt, 1983) to develop the concept of the vertebrate ‘New Head’, according to which the properties of placodal sensory organs and the newly acquired NC enabled the evolutionary transition from protochordates to vertebrates. The development of the head as we know it – with protection by the skull, prominent jaws and highly developed sensory organs and brain – coincided with changes in animal lifestyle, from filter-feeding animals to vertebrates that were endowed with active predation and locomotion and sophisticated sensory-motor modalities. This theory was updated to account for important experimental embryological findings in the interim (Northcutt, 2005) and has been largely accepted. Thus, the NC is a crucial innovation that underlies vertebrate success and diversification. This aspect of NC research provides a powerful demonstration of how embryology can inform evolutionary studies.

The contribution of the NC to the vertebrate head extends to the brain, even though NC cells do not directly produce brain tissue (Creuzet et al., 2004; Etchevers et al., 1999). Experiments that were performed on avian embryos revealed that both fore- and midbrain development depends upon the production of BMP-antagonizing factors by the region of the cephalic NC that is fated to construct the facial skeleton (‘facial skeletogenic neural crest’ or FSNC: NC from the posterior half of the diencephalon down to the level of rhombomeres 1 and 2 included). Excision of the FSNC results in the absence of facial structures, but the brain also shows major defects: failure of the development of telencephalon, thalamus and optic tectum, those brain regions that are derived from the lateral

territories of the rostral neural plate (Couly and Le Douarin, 1987). Production of fibroblast growth factor 8 (Fgf8) by two secondary brain organisers, the anterior neural ridge (ANR) and the isthmus between midbrain and hindbrain, is crucial for the development of the encephalic vesicles. One of the early consequences of FSNC removal is a strong decrease in the production of Fgf8 by these two areas, and exogenous Fgf8 was able to rescue the deleterious effects of FSNC excision on brain development (Creuzet et al., 2004). FSNCs achieve this effect by producing anti-Bmp4 secreted molecules such as noggin and gremlin. Bmp4 is a strong antagonist of Fgf8 production (Ohkubo et al., 2002), and NC cells therefore play a regulatory role in the production of Fgf8 during the early stages of neurogenesis (Creuzet, 2009; reviewed by Le Douarin et al., 2012).

Therefore, the role of the cephalic NC in head development is not restricted to providing the cells that build the skeleton and connective tissues of the face. It also acts as an organizing centre, able to regulate the activity of both the ANR and the isthmus in brain patterning.

#### Multipotency and stemness of neural crest cells

In the late 1980s, labelling with fluorescent vital dyes further advanced our knowledge of NC fate. A painstaking but efficient method that was pioneered by Marianne Bronner and Scott Fraser involved the microinjection into single NC cells of a large fluorescent carbohydrate, which avoided issues of membrane-to-membrane diffusion (Bronner-Fraser and Fraser, 1988). Following single cell progeny (until the dilution of the dye by cell divisions) gave insight into their early potential and migratory behaviour; it demonstrated for the first time *in vivo* multipotency of individual premigratory NC cells in the chick (Bronner-Fraser and Fraser, 1988, 1989; Fraser and Bronner-Fraser, 1991), a finding that was later fully confirmed in

mammals using NC *in vivo* lineage tracing of the R26R-Confetti mouse model (Baggiolini et al., 2015). Microinjection of a fluorescent dye into individual NC cells was subsequently applied to *Xenopus* (Collazo et al., 1993), zebrafish (Raible and Eisen, 1994; Schilling and Kimmel, 1994) and whole-embryo mouse cultures (Serbedzija et al., 1994). In a complementary approach, *lacZ*-expressing retroviruses were injected at low dilution into the neural tube, which led to the *in vivo* identification of bipotent neuron/glia NC precursors that form the dorsal root ganglia (Frank and Sanes, 1991).

The wide diversity of cell types that arise from the NC and their extensive migration within the body are features they share with haematopoietic stem cells, which give rise to all blood cell lineages throughout life and which were the first tissue-specific stem cells to be identified in higher vertebrates (Till and McCulloch, 1961; Bradley and Metcalf, 1966; reviewed by Metcalf, 2007). Inspired by *in vitro* colony assays that were developed for haematopoietic progenitors, the developmental potential of single NC cells began to be studied *in vitro* in the late 1980s (see timeline in Fig. 3). In some of the first experiments, mesencephalic quail NC cells explanted at an early migratory stage were found to give rise to various combinations and numbers of glial cells, adrenergic neurons and melanocytes, together with less-frequent cartilage cells (Baroffio et al., 1988, 1991; Dupin et al., 1990). Around this time, and using a similar *in vitro* clonal assay, stem cells that produce both neurons and glia in the mammalian embryonic CNS were also discovered (Temple, 1989). Further investigations showed that single quail cephalic NC cells are highly multipotent *in vitro*, giving rise to peripheral neurons and glia, melanocytes, chondrocytes, osteocytes and fat cells (Calloni et al., 2007, 2009; da Costa et al., 2018). These data support a common cellular origin for components of the cranial PNS and craniofacial mesenchymal tissues in vertebrates, which suggests a model of NC cell diversification that involves

multipotent progenitors rather than a collection of distinctly committed cells (Dupin et al., 2010, 2018; Trentin et al., 2004).

In experiments in the 1970s, neural tubes were explanted and NC cells were allowed to migrate away from the explants before being cultured in order to determine their potency (Cohen and Konigsberg, 1975; Sieber-Blum and Cohen, 1980). Variations on this simple and efficient technique of NC cell isolation were later employed for many *in vitro* studies of avian and mammalian (including human) NC cells (Stemple and Anderson, 1992; Thomas et al., 2008; reviewed by Etchevers, 2011; Dupin and Coelho-Aguiar, 2013). Together with improvements in culture conditions and availability of antibodies against a wider range of phenotype-specific antigens, a more comprehensive picture of the developmental repertoire of NC cells has emerged (reviewed by Dupin and Sommer, 2012; Dupin et al., 2018). It transpired that whereas some avian trunk NC cells were multipotent progenitors (for glial cells, autonomic neurons, melanocytes and smooth muscle cells), others were only bipotent (Lahav et al., 1998; Trentin et al., 2004).

The cardinal stem cell property of self-renewal was first demonstrated in multipotent rat NC cells in culture (Stemple and Anderson, 1992), and similar NC stem cells were also found in the foetal sciatic nerve (Morrison et al., 1999). Self-renewal was subsequently observed in oligopotent NC cells *in vitro* across species: bipotent progenitors for melanocytes/glia cells (Trentin et al., 2004) and glial/smooth muscle cells (Bittencourt et al., 2013) in the quail; autonomic/sensory neuron progenitors of the early murine NC (Kléber et al., 2005); and premigratory chick and human cranial NC cells maintained as multipotent floating spheres (Kerosuo et al., 2015). Self-renewal is, therefore, a wide-ranging feature of NC cells.

Interestingly, *in vitro* work has revealed that some NC potentials are not fulfilled *in vivo*. For example, although incapable of becoming mesenchymal derivatives *in vivo*, amniote trunk NC cells could differentiate into cartilage, bone and fat cells *in vitro*

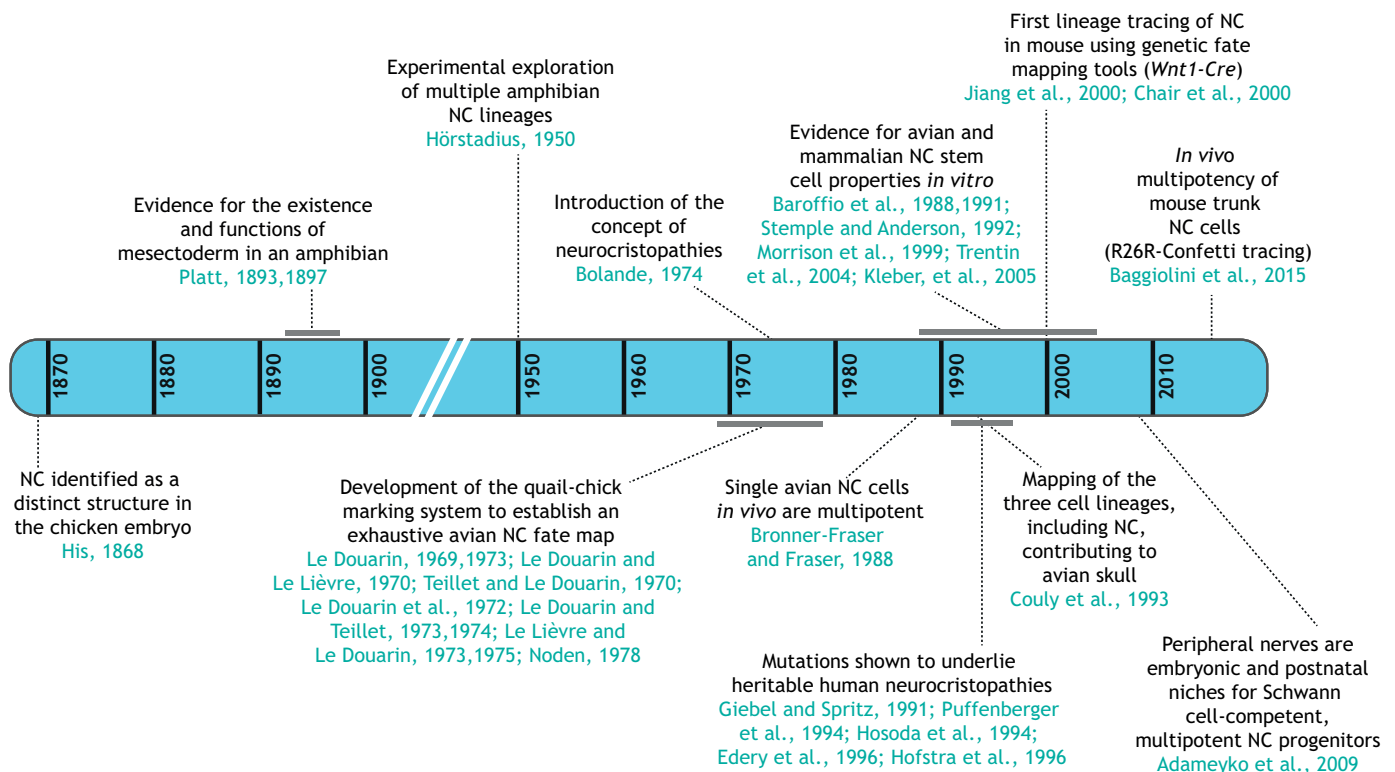

Fig. 3. Timeline showing some of the key discoveries in neural crest research.

(Abzhanov et al., 2003; Billon et al., 2007; Calloni et al., 2007; Coelho-Aguiar et al., 2013; Ido and Ito, 2006; McGonnell and Graham, 2002). Notably, these mesenchymal cell types were found together with neural cells and/or melanocytes in the clonal progeny of NC cells that were isolated from trunk and cranial axial levels (Coelho-Aguiar et al., 2013; da Costa et al., 2018). Multipotent neural-mesenchymal NC progenitors are therefore present all along the neural axis.

Remarkably, the multipotency of NC-derived progenitors extends into postnatal and adult stages. Genetic lineage tracing in mice has shown that not only the PNS but also hair follicles, cornea and iris, carotid body, dental pulp, bone marrow and oral mucosa contain oligo- or multipotent NC cells with self-renewal ability in culture (reviewed by Dupin and Coelho-Aguiar, 2013; Motohashi and Kunisada, 2015). Such widespread tissue distribution of multipotent NC cells may be maintained through association with the pervasive network of PNS nerves and their terminals. Although located in their 'niche' along nerves, NC cells assume a Schwann cell precursor (SCP) identity; however, after detaching from it, they can adopt a non-glial fate and produce melanocytes both during development and lifelong regenerative turnover in hair follicles (Adameyko et al., 2009). More generally, SCPs appear to serve as a reservoir of NC progenitors with diversified fates and ensure the production of some distant or late-forming NC derivatives such as ventral pigment cells, cranial parasympathetic neurons, endocrine chromaffin cells and subpopulations of enteric neurons (reviewed by Furlan and Adameyko, 2018). In the adult, SCPs can assume a stem cell function for osteoblast and dental pulp cell replacement in the continuously growing mouse incisor (Kaukua et al., 2014); they are also likely to be a source for resident NC-derived mesenchymal stem cells in the bone marrow and dermis (Fernandes et al., 2004; Isern et al., 2014; Nagoshi et al., 2008).

### Relevance of neural crest experimental embryology to human health

Identification of a common NC contribution to disparate tissues provided an explanation of clinical associations of symptoms that had not been previously understood. Such diseases that could be ultimately traced back to a problem in NC development were called 'neurocristopathies' (Bolande, 1974, 1997; reviewed among many others by Etchevers et al., 2006; Watt and Trainor, 2014; Vega-Lopez et al., 2018) (see timeline in Fig. 3). Parallel technical advances in molecular embryology and human genetics at the end of the 20th century then guided the first discoveries of genes that cause many of these conditions and, in return, vertebrate embryo models revealed how these genes worked in NC development.

### Many birth defects are imputable to neural crest pathology

The neurocristopathy concept first emerged from embryological lineage tracing. Whereas derivatives of a sole NC cell lineage can be affected by a given cancer or malformation, the original insight was that NC derivatives in multiple but distant organs, such as the skin and the intestine, can be simultaneously afflicted in the same disease. Thus, neurocristopathies may occur in isolation or in syndromic combination with other affected NC derivatives. Together, craniofacial and cardiac outflow tract anomalies, which affect areas that are heavily dependent on NC cell influx and remodelling, are among the most common and frequently associated human birth defects (Beligere et al., 1977). They are characteristic signs of common genetic conditions such as chromosome 21 trisomy or 22q11.2 microdeletion, but also those induced by the environment during pregnancy (for example, foetal alcohol

spectrum disorders or vitamin deficiencies), with a heavy burden in terms of human morbidity and mortality.

For example, piebaldism (the congenital absence of melanocytes from areas of the skin) can lead to a white forelock on the scalp, but it can also be associated with deafness caused by a lack of melanocytes in the cochlea. Many domesticated animals with white ears, including cows, cats and horses, are also deaf for the same reason (Steel and Barkway, 1989). In the congenital Waardenburg-Shah (WS) syndrome type 4 (WS4), piebaldism and/or hearing loss occur in conjunction with a distinct neurocristopathy known as Hirschsprung disease (HSCR), the lack of distal development of the ENS at the level of the rectum and colon, preventing effective defecation. Ablation experiments in chick embryos carried out by Ernest van Campenhout in the 1930s and by Chester Yntema and Warner Hammond in the 1950s laid the groundwork for understanding that HSCR might stem from a genetic problem to which migratory vagal NC would be particularly susceptible (reviewed by Le Douarin and Kalcheim, 1999). Subsequent lineage-labelling experiments (including quail-chick chimeras) showed that NC cells from the posterior hindbrain migrate to the inner ear, the skin, the ENS, and the cardiac outflow tract. A defined NC region could thus yield progenitors in a wide range of tissues, which helps to explain how some children with WS4 exhibit head pigmentation defects in combination with cardiac outflow tract malformations and dysmorphic facial features. However, it should be noted that congenital heart defects and cleft palate are also often found together, without HSCR or deafness, which illustrates the variety of neurocristopathy associations.

As reviewed earlier, NC cells from specific origins along the anterior-posterior axis can yield unique types of derivatives in the body, such as those from the FSNC that alone give rise to craniofacial bones, those from the vagal NC that alone contribute to the aortic valve, or those from the adreno-medullary NC that alone populate the adrenal gland. The regulation of such regional differences involves Hox transcription factor genes, full repression of which was shown to be necessary for skull formation in mouse (Gendron-Maguire et al., 1993; Rijli et al., 1993) and chick (Couly et al., 1998). Lineage-specific *Hoxb1* gain of function also interferes with vagal NC identity in mice and induces cardiac outflow tract malformations (Zaffran et al., 2018). In the ocular, cerebral and facial territories reproducibly affected by Sturge-Weber and cerebrofacial arteriovenous metameric vascular malformation syndromes, there are often malformations of adjacent nerves and NC-derived bones (Krings et al., 2007; Nakashima et al., 2014). Quail-chick xenografts have shown that endothelial cells can differentiate inappropriately in response to signals that are specific to these distinct sectors of NC-derived perivascular or SCP cells (Othman-Hassan et al., 2001); recently, causal somatic mutations in an intracellular signalling effector have been found within endothelial cells of those facial areas affected in Sturge-Weber syndrome (Huang et al., 2017). This implies that there remains a large class of human neurocristopathies to be identified as such, which are not only due to direct or indirect impairment of cell-autonomous NC differentiation, but also to their non-cell-autonomous inductive functions.

Indeed, the definition of 'neurocristopathy' has become more flexible, following experiments that have shown that NC cells can be instructive during organogenesis, but sometimes only leave a minor final contribution to the adult organ. For example, destruction or microsurgical removal of the neural tube or neural folds *in situ*, which was used for decades to identify potential NC contributions to tissues in animal models (Dushane, 1938), helped to interpret the common origin of thymic and cardiac outflow tract malformations

in DiGeorge syndrome. In chicken embryos, such malformations can be reproduced in large part by removing NC at the level of the posterior hindbrain (Bockman and Kirby, 1984). Likewise, forebrain, eye and pituitary growth all depend on the modulation of local inductive signals by the FSNC, as mentioned earlier (Creuzet, 2009; Etchevers et al., 1999; Evans and Gage, 2005). These tissues are sensitive to gene mutations that induce holoprosencephaly, which may be associated with cleft palate or outflow tract malformations (reviewed by Cavodeassi et al., 2018).

NC derivatives are preferentially but almost never exclusively affected in most heritable genetic syndromic ‘neurocristopathies’ because the developmental genes that are involved usually demonstrate pleiotropy. In the 1990s, the first mutations in genes, the normal function of which is necessary for NC migration into the developing gut, were identified in human HSCR patients and several mouse models (reviewed by Bondurand and Southard-Smith, 2016; see timeline in Fig. 3). Mutations in *RET*, which encodes a receptor for glial cell-derived neurotrophic factor (GDNF; Ederly et al., 1994), or in the genes that encode the cytokine endothelin-3 (*EDN3*) and its type-B receptor (*EDNRB*) (Ederly et al., 1996; Hofstra et al., 1996; Hosoda et al., 1994; Puffenberger et al., 1994), can all cause HSCR. In fact, an overlapping range of WS endophenotypes, including pigmentary anomalies, deafness or HSCR, but also limb malformations, can result from mutations in any one of a handful of individual genes (reviewed by Pingault et al., 2010), including transcription factor genes *SOX10*, *PAX3*, *MITF* and *SNAI2*. Piebaldism alone can be caused by interstitial deletions of *SNAI2* (Sanchez-Martin et al., 2002), but also by inactivating mutations of *KIT*, which encodes the receptor for stem cell factor (SCF) (Giebel and Spritz, 1991) and does not cause WS. Importantly, all the aforementioned transcription factors have been characterized in animal models as key players in gene regulatory networks that control the formation and migration of NC cells (e.g. Sauka-Spengler and Bronner-Fraser, 2008; Simoes-Costa and Bronner, 2015) but also in other processes (haematopoiesis; muscle, eye, brain, or gonad formation). The similarly pleiotropic growth factors and their receptors (e.g. GDNF/RET, EDN3/EDNRB and SCF/KIT) regulate normal NC maturation and the migration of its derivatives – the ENS and melanocytes – that must disperse furthest from their point of origin and throughout large surfaces of the body. However, all of these, and others, can also be mutated in multiple types of human cancer, and are collectively known as oncogenes.

#### Neural crest cell susceptibility to cancer

Quail-chick chimeras identified the NC origin of the sympatho-adrenal lineage (Le Douarin and Teillet, 1971), which later segregates into sympathetic ganglionic and adreno-medullary cells in both avian and mouse embryos (Anderson and Axel, 1986; Furlan et al., 2017). This lineage is particularly susceptible to cancers such as neuroblastoma and pheochromocytoma (a secretory tumour of the adrenal gland). It is also the site of a heritable genetic predisposition throughout life to multiple endocrine neoplasia type II (MEN2), including pheochromocytoma and tumours of the thyroid medulla and carotid bodies, and other paragangliomas that target NC-derived cells (reviewed by Maguire et al., 2015). Interestingly, mutations in the same genes can cause distinct malformations or cancers in NC-derived tissues. Loss-of-function *RET* mutations can cause HSCR but gain-of-function mutations can cause MEN2 (Takahashi et al., 1999); loss-of-function *KIT* mutations in melanocytes can cause piebaldism but gain-of-function mutations can cause melanoma (Willmore-Payne et al.,

2005; Curtin et al., 2006). Gene mutations in the transcription factor gene *PHOX2B* cause life-threatening hindbrain malformations; as they can also affect vagal or sympatho-adrenal NC derivatives, these can be associated with either HSCR or neuroblastoma (Amiel et al., 2003). Indeed, *PHOX2B* is a driver gene and part of the core regulatory circuitry for isolated neuroblastoma (Boeva et al., 2017), the most common cancer in the first year of life.

For many common cancers of the lung, colon or breast, activating mutations in oncogenes are usually acquired in the affected tissues well after fertilization or birth. However, the very same somatic mutations can cause syndromic birth defects in the neurocristopathy spectrum. For example, post-zygotic mutations in a handful of genes that encode effectors of receptor-activated signalling pathways cause giant congenital melanocytic nevus (e.g. Etchevers et al., 2018; da Silva et al., 2018), whereas germline mutations of those genes cause cardio-facial-cutaneous, Noonan or autoimmune lymphoproliferative syndromes, among others (e.g. Champion et al., 2011; Oliveira et al., 2007). Susceptibility to neuroblastoma, neurofibroma or melanoma is a feature of these and other constitutional neurocristopathy syndromes.

Finally, experimental embryology using mouse (e.g. Rinon et al., 2011; reviewed by Gallik, et al., 2017) and zebrafish (e.g. White et al., 2011; reviewed by van Rooijen et al., 2017) has introduced the concept that cancers prone to metastasis reactivate the molecular programmes that favour migration and tissue invasion that are normally used and needed by multipotent NC cells. Thus, developmental biology has informed not only the direct and indirect roles of neurocristopathies in birth defects but also in cancer throughout life, although neurocristopathies overall disproportionately affect children.

#### Stem cell-based therapeutic approaches

As ethical and scientific challenges make it difficult to isolate and study embryonic human NC cells (Thomas et al., 2008), several protocols have been developed to derive NC-like cells from pluripotent human embryonic stem cell lines (Kerosuo et al., 2015; Lee et al., 2007), induced pluripotent stem cells (iPSCs) (Avery and Dalton, 2015; Menendez et al., 2012), or by direct reprogramming of paediatric fibroblasts (Kim et al., 2014). Notably, such protocols could not have been generated without developmental biology studies that revealed NC molecular markers and the extrinsic and intrinsic molecules that are needed for NC cell maintenance and directed cell differentiation; indeed, all efforts to derive specific cell types from stem cells (or by reprogramming) have been guided by lessons learned from the embryo. Applying genome-wide analysis to these cellular models can help define human NC cell differentiation mechanisms during normal development, such as sequential enhancer activation and epigenetic annotations (Bajpai et al., 2010; Rada-Iglesias et al., 2012).

Although translational applications have not yet appeared, patient-derived NC-like cells promise to provide a cellular platform for disease modelling and drug screening, as exemplified for familial dysautonomia (Kim et al., 2014; Zeltner et al., 2016), and to permit future innovative therapies that are based on autologous cell grafts and tissue engineering (Liu and Cheung, 2016). As a proof of principle, NC-derived dental pulp stem cells, first identified from murine lineage tracing (Chai et al., 2000), emerge from grafts to mineralize and repair experimentally induced calvarial defects (Lacerda-Pinheiro et al., 2012). Xenografts of patient-derived iPSCs that are differentiated into NC-like cells and then grafted into early mouse embryos can differentiate into functional pigment cells, which may ultimately facilitate the development of better models for



understanding and treating complex neurocristopathies (Cohen et al., 2016). We further predict that gene editing of autologous NC-like cells *ex vivo* may enable them to not only differentiate appropriately for therapeutic implantation back to the donor and the replenishment of the affected tissue, but potentially to become migrating medication delivery devices, able to home to remote sites that are predicted from experimental and molecular embryology.

### Concluding remarks

The aim of this review was to highlight the remarkable progress that has been accomplished during the 150 years following the discovery of the NC. The capacity of NC cells to migrate all over the developing embryo and to settle in defined sites is unique in the vertebrate embryo. For more than a hundred years, the main purpose of researchers' interest in this structure was to decipher the fate and migration routes of these cells leaving the dorsal neural tube to colonize the embryo. This early and indispensable line of research revealed the original characteristics that had remained elusive for so long: NC cells turned out to be a population of highly multipotent, flexible, proliferative cells that migrate to various sites and are largely influenced in their terminal differentiation by environmental cues.

The multipotentiality of NC cells was revealed by complementary evidence from both single cell *in vitro* cultures and *in vivo* labelling. Multipotent NC progenitors and stem cells are not only present at early stages of migration and during the formation of NC derivatives, but they later persist in an astonishing number of tissues and organs of the adult. Crucial to this wide distribution of NC-derived progenitors in time and space is the role of the vast network of PNS nerves, which convey and store multipotent NC cells of pre-glial identity (the SCPs). Whether these progenitors, which are distributed in many tissues, can be mobilized for broader regenerative events or injury repair remains to be explored in appropriate animal injury models. The recently discovered broad distribution and versatility of NC-derived stem cells will spur future exploration of their molecular properties and responses to environmental signals. Multi-omics approaches, particularly those that have been recently developed at single cell resolution, will likely afford important novel insights into these questions in the near future.

After they have settled in their destination, NC cells fulfil multiple functions. By providing the body with the cells of the PNS, they play a major role not only in the coordination of organ functions, but also in adaptation of the organism to environmental conditions. One example of the role of the PNS is the vasoactive reactions to outside temperature; another is the efficient screen against UV radiation provided by melanocytes, a cell type of NC origin that expands, mainly in the skin. Moreover, NC-derived neuro-endocrine cells, such as those in the adrenal medulla and carotid body, enable response to environmental stress and further contribute to the maintenance of physiological homeostasis.

One of the most profound discoveries in NC research was that of its paramount role in building the vertebrate head. Among multi-cellular organisms, it is in vertebrates and, in particular, in humans that the brain has reached its most complex differentiation and acquired higher-level capacities. This has coincided with the development of sense organs and the elaboration of complex facial structures to enable and protect them, a function that has been accomplished by the cells of the NC. Plasticity and diversity in cephalic forms that is conferred by NC cells has also enabled evolutionary success for the vertebrates. The development of cardiopharyngeal structures is particularly crucial and, as a consequence, is subject to multiple kinds of interference that engender human variations in cardiac great

vessel and oral anatomy that range from sub-morbid to lethal. Knowledge that has been acquired about cranial NC development in embryonic animal models has also enriched our appreciation of the pathophysiology of dozens of rare diseases, of which only a sample is described in the present review, and which collectively represent another large proportion of congenital malformations. Continued investments in primary research on the many fronts that have opened in NC biology, particularly in stem cell engineering, will have increasingly immediate repercussions on the management of human disease.

### Competing interests

The authors declare no competing or financial interests.

### Funding

This research received no specific grant from any funding agency in the public, commercial or not-for-profit sectors.

### References

- Abzhanov, A., Tzahor, E., Lassar, A. B. and Tabin, C. J. (2003). Dissimilar regulation of cell differentiation in mesencephalic (cranial) and sacral (trunk) neural crest cells *in vitro*. *Development* **130**, 4567-4579.
- Adameyko, I., Lallemand, F., Aquino, J. B., Pereira, J. A., Topilko, P., Müller, T., Fritz, N., Beljajeva, A., Mochii, M., Liste, I. et al. (2009). Schwann cell precursors from nerve innervation are a cellular origin of melanocytes in skin. *Cell* **139**, 366-379.
- Ahlstrom, J. D. and Erickson, C. A. (2009). The neural crest epithelial-mesenchymal transition in 4D: a "tail" of multiple non-obligatory cellular mechanisms. *Development* **136**, 1801-1812.
- Amiel, J., Laudier, B., Attié-Bitach, T., Trang, H., de Pontual, L., Gener, B., Trochet, D., Etchevers, H., Ray, P., Simonneau, M. et al. (2003). Polyalanine expansion and frameshift mutations of the paired-like homeobox gene PHOX2B in congenital central hypoventilation syndrome. *Nat. Genet.* **33**, 459-461.
- Anderson, D. J. and Axel, R. (1986). A bipotential neuroendocrine precursor whose choice of cell fate is determined by NGF and glucocorticoids. *Cell* **47**, 1079-1090.
- Arima, Y., Miyagawa-Tomita, S., Maeda, K., Asai, R., Seya, D., Minoux, M., Rijli, F. M., Nishiyama, K., Kim, K.-S., Uchijima, Y. et al. (2012). Preotic neural crest cells contribute to coronary artery smooth muscle involving endothelin signalling. *Nat. Commun.* **3**, 1267.
- Avery, J. and Dalton, S. (2015). Methods for derivation of multipotent neural crest cells derived from human pluripotent stem cells. *Methods Mol. Biol.* **1341**, 197-208.
- Bae, C.-J., Park, B.-Y., Lee, Y.-H., Tobias, J. W., Hong, C.-S. and Saint-Jeannet, J.-P. (2014). Identification of Pax3 and Zic1 targets in the developing neural crest. *Dev. Biol.* **386**, 473-483.
- Baggiolini, A., Varum, S., Mateos, J. M., Bettosini, D., John, N., Bonalli, M., Ziegler, U., Dimou, L., Clevers, H., Furrer, R. et al. (2015). Premigratory and migratory neural crest cells are multipotent *in vivo*. *Cell Stem Cell* **16**, 314-322.
- Bajpai, R., Chen, D. A., Rada-Iglesias, A., Zhang, J., Xiong, Y., Helms, J., Chang, C.-P., Zhao, Y., Swigut, T. and Wysocka, J. (2010). CHD7 cooperates with PBAF to control multipotent neural crest formation. *Nature* **463**, 958-962.
- Balfour, F. M. (1881). *A Treatise on Comparative Embryology*, Vol. 2. London: Macmillan & Co.
- Balfour, F. M. and Foster, M. (1876). On the Development of the Spinal Nerves in Elasmobranch Fishes. *Philos. Trans. R. Soc. London* **166**, 175-195.
- Baroffio, A., Dupin, E. and Le Douarin, N. M. (1988). Clone-forming ability and differentiation potential of migratory neural crest cells. *Proc. Natl. Acad. Sci. USA* **85**, 5325-5329.
- Baroffio, A., Dupin, E. and Le Douarin, N. M. (1991). Common precursors for neural and mesectodermal derivatives in the cephalic neural crest. *Development* **112**, 301-305.
- Baster, L., Watkins-Choz, D., Pavan, W. and Loftus, S. (2018). A curated gene list for expanding the horizons of pigmentation biology. *Pigment Cell Melanoma Res.* **23**, 171.
- Beligere, N., Bentson, W., Pruzansky, S. and Rosenthal, I. M. (1977). Association of congenital heart disease and oro-facial anomalies. *Pediatr. Res.* **11**, 524.
- Bergwerff, M., Verberne, M. E., DeRuiter, M. C., Poelmann, R. E. and Gittenberger-de Groot, A. C. (1998). Neural crest cell contribution to the developing circulatory system: implications for vascular morphology? *Circ. Res.* **82**, 221-231.
- Bhatt, S., Diaz, R. and Trainor, P. A. (2013). Signals and switches in mammalian neural crest cell differentiation. *Cold Spring Harb. Perspect. Biol.* **5**, a008326.
- Billon, N., Iannarelli, P., Monteiro, M. C., Glavieux-Pardanaud, C., Richardson, W. D., Kessar, N., Dani, C. and Dupin, E. (2007). The generation of adipocytes by the neural crest. *Development* **134**, 2283-2292.

- Bittencourt, D. A., da Costa, M. C., Calloni, G. W., Alvarez-Silva, M. and Trentin, A. G.** (2013). Fibroblast growth factor 2 promotes the self-renewal of bipotent glial smooth muscle neural crest progenitors. *Stem Cells Dev.* **22**, 1241-1251.
- Bockman, D. E. and Kirby, M. L.** (1984). Dependence of thymus development on derivatives of the neural crest. *Science* **223**, 498-500.
- Boeva, V., Louis-Brennetot, C., Peltier, A., Durand, S., Pierre-Eugène, C., Raynal, V., Etchevers, H. C., Thomas, S., Lermine, A., Daudigeos-Dubus, E. et al.** (2017). Heterogeneity of neuroblastoma cell identity defined by transcriptional circuitries. *Nat. Genet.* **49**, 1408-1413.
- Bolande, R. P.** (1974). The neurocristopathies: a unifying concept of disease arising in neural crest development. *Hum. Pathol.* **5**, 409-429.
- Bolande, R. P.** (1997). Neurocristopathy: its growth and development in 20 years. *Pediatr. Pathol. Lab. Med.* **17**, 1-25.
- Bondurand, N. and Southard-Smith, E. M.** (2016). Mouse models of Hirschsprung disease and other developmental disorders of the enteric nervous system: old and new players. *Dev. Biol.* **417**, 139-157.
- Bradley, T. and Metcalf, D.** (1966). The growth of mouse bone marrow cells in vitro. *Aust. J. Exp. Biol. Med. Sci.* **44**, 287-300.
- Bronner-Fraser, M. and Fraser, S. E.** (1988). Cell lineage analysis reveals multipotency of some avian neural crest cells. *Nature* **335**, 161-164.
- Bronner-Fraser, M. and Fraser, S.** (1989). Developmental potential of avian trunk neural crest cells in situ. *Neuron* **3**, 755-766.
- Buitrago-Delgado, E., Nordin, K., Rao, A., Geary, L. and LaBonne, C.** (2015). Neurodevelopment. Shared regulatory programs suggest retention of blastula-stage potential in neural crest cells. *Science* **348**, 1332-1335.
- Burns, A. J. and Le Douarin, N. M.** (1998). The sacral neural crest contributes neurons and glia to the post-umbilical gut: spatiotemporal analysis of the development of the enteric nervous system. *Development* **125**, 4335-4347.
- Calloni, G. W., Glavieux-Pardanaud, C., Le Douarin, N. M. and Dupin, E.** (2007). Sonic Hedgehog promotes the development of multipotent neural crest progenitors endowed with both mesenchymal and neural potentials. *Proc. Natl. Acad. Sci. USA* **104**, 19879-19884.
- Calloni, G. W., Le Douarin, N. M. and Dupin, E.** (2009). High frequency of cephalic neural crest cells shows coexistence of neurogenic, melanogenic, and osteogenic differentiation capacities. *Proc. Natl. Acad. Sci. USA* **106**, 8947-8952.
- Cavodeassi, F., Creuzet, S. and Etchevers, H. C.** (2018). The hedgehog pathway and ocular developmental anomalies. *Hum. Genet.*, s00439-018-1918-8.
- Chai, Y., Jiang, X., Ito, Y., Bringas, P., Han, J., Rowitch, D. H., Soriano, P., McMahon, A. P. and Sucov, H. M.** (2000). Fate of the mammalian cranial neural crest during tooth and mandibular morphogenesis. *Development* **127**, 1671-1679.
- Champion, K. J., Bunag, C., Estep, A. L., Jones, J. R., Bolt, C. H., Rogers, R. C., Rauen, K. and Everman, D.** (2011). Germline mutation in BRAF codon 600 is compatible with human development: De novo p.V600G mutation identified in a patient with CFC syndrome. *Clin. Genet.* **79**, 468-474.
- Chibon, P.** (1964). Analyse par la méthode de marquage nucléaire à la thymidine tritiée des dérivés de la crête neurale céphalique chez l'Urodèle *Pleurodeles waltlii* michah. *C. R. Hebd. Seances Acad. Sci.* **259**, 3624-3627.
- Chibon, P.** (1967). Marquage nucléaire par la thymidine tritiée des dérivés de la crête neurale chez l'Amphibien Urodèle *Pleurodeles waltlii* Michah. *J. Embryol. Exp. Morphol.* **18**, 343-358.
- Coelho-Aguiar, J. M., Le Douarin, N. M. and Dupin, E.** (2013). Environmental factors unveil dormant developmental capacities in multipotent progenitors of the trunk neural crest. *Dev. Biol.* **384**, 13-25.
- Cohen, A. M. and Konigsberg, I. R.** (1975). A clonal approach to the problem of neural crest determination. *Dev. Biol.* **46**, 262-280.
- Cohen, M. A., Wert, K. J., Goldmann, J., Markoulaki, S., Buganim, Y., Fu, D. and Jaenisch, R.** (2016). Human neural crest cells contribute to coat pigmentation in interspecies chimeras after in utero injection into mouse embryos. *Proc. Natl. Acad. Sci. USA* **113**, 1570-1575.
- Collazo, A., Bronner-Fraser, M. and Fraser, S. E.** (1993). Vital dye labelling of *Xenopus laevis* trunk neural crest reveals multipotency and novel pathways of migration. *Development* **118**, 363-376.
- Couly, G. F. and Le Douarin, N. M.** (1987). Mapping of the early neural primordium in quail-chick chimeras. II. The prosencephalic neural plate and neural folds: implications for the genesis of cephalic human congenital abnormalities. *Dev. Biol.* **120**, 198-214.
- Couly, G. F., Coltey, P. M. and Le Douarin, N. M.** (1992). The developmental fate of the cephalic mesoderm in quail-chick chimeras. *Development* **114**, 1-15.
- Couly, G. F., Coltey, P. and Le Douarin, N. M.** (1993). The triple origin of skull in higher vertebrates: a study in quail-chick chimeras. *Development* **117**, 409-429.
- Couly, G., Coltey, P., Eichmann, A. and Le Douarin, N. M.** (1995). The angiogenic potentials of the cephalic mesoderm and the origin of brain and head blood vessels. *Mech. Dev.* **53**, 97-112.
- Couly, G., Grapin-Botton, A., Coltey, P. and Le Douarin, N. M.** (1996). The regeneration of the cephalic neural crest, a problem revisited: the regenerating cells originate from the contralateral or from the anterior and posterior neural fold. *Development* **122**, 3393-3407.
- Couly, G., Grapin-Botton, A., Coltey, P., Ruhin, B. and Le Douarin, N. M.** (1998). Determination of the identity of the derivatives of the cephalic neural crest: incompatibility between Hox gene expression and lower jaw development. *Development* **125**, 3445-3459.
- Creuzet, S. E.** (2009). Regulation of pre-otic brain development by the cephalic neural crest. *Proc. Natl. Acad. Sci. USA* **106**, 15774-15779.
- Creuzet, S., Schuler, B., Couly, G. and Le Douarin, N. M.** (2004). Reciprocal relationships between Fgf8 and neural crest cells in facial and forebrain development. *Proc. Natl. Acad. Sci. USA* **101**, 4843-4847.
- Creuzet, S., Vincent, C. and Couly, G.** (2005). Neural crest derivatives in ocular and periocular structures. *Int. J. Dev. Biol.* **49**, 161-171.
- Curtin, J. A., Busam, K., Pinkel, D. and Bastian, B. C.** (2006). Somatic activation of KIT in distinct subtypes of melanoma. *J. Clin. Oncol.* **24**, 4340-4346.
- da Costa, M. C., Trentin, A. G. and Calloni, G. W.** (2018). FGF8 and Shh promote the survival and maintenance of multipotent neural crest progenitors. *Mech. Dev.* **154**, 251-258.
- Danielian, P. S., Muccino, D., Rowitch, D. H., Michael, S. K. and McMahon, A. P.** (1998). Modification of gene activity in mouse embryos in utero by a tamoxifen-inducible form of Cre recombinase. *Curr. Biol.* **8**, 1323-1326.
- da Silva, V. M., Martinez-Barrios, E., Tell-Martí, G., Dabad, M., Carrera, C., Aguilera, P., Brualla, D., Esteve-Codina, A., Vicente, A. et al.** (2018). Genetic abnormalities in large to giant congenital nevi: beyond NRAS mutations. *J. Invest. Dermatol.* S0022-202X(18)32683-6.
- Dupin, E. and Coelho-Aguiar, J. M.** (2013). Isolation and differentiation properties of neural crest stem cells. *Cytom. Part A* **83A**, 38-47.
- Dupin, E. and Sommer, L.** (2012). Neural crest progenitors and stem cells: from early development to adulthood. *Dev. Biol.* **366**, 83-95.
- Dupin, E., Baroffio, A., Dulac, C., Cameron-Curry, P. and Le Douarin, N. M.** (1990). Schwann-cell differentiation in clonal cultures of the neural crest, as evidenced by the anti-Schwann cell myelin protein monoclonal antibody. *Proc. Natl. Acad. Sci. USA* **87**, 1119-1123.
- Dupin, E., Calloni, G. W. and Le Douarin, N. M.** (2010). The cephalic neural crest of amniote vertebrates is composed of a large majority of precursors endowed with neural, melanocytic, chondrogenic and osteogenic potentialities. *Cell Cycle* **9**, 238-249.
- Dupin, E., Calloni, G. W., Coelho-Aguiar, J. M. and Le Douarin, N. M.** (2018). The issue of the multipotency of the neural crest cells. *Dev. Biol.*, S0012-1606(17)30923-5.
- Dushane, G. P.** (1938). Pigment cells, spinal ganglia and Rohon-Beard cells. *J. Exp. Zool.* **78**, 485-503.
- Edey, P., Lyonnet, S., Mulligan, L. M., Pelet, A., Dow, E., Abel, L., Holder, S., Nihoul-Fekete, C., Ponder, B. A. and Munnich, A.** (1994). Mutations of the RET proto-oncogene in Hirschsprung's disease. *Nature* **367**, 378-380.
- Edey, P., Attié, T., Amiel, J., Pelet, A., Eng, C., Hofstra, R. M., Martelli, H., Bidaud, C., Munnich, A. and Lyonnet, S.** (1996). Mutation of the endothelin-3 gene in the Waardenburg-Hirschsprung disease (Shah-Waardenburg syndrome). *Nat. Genet.* **12**, 442-444.
- El Robrini, N., Etchevers, H. C., Ryckebüsch, L., Faure, E., Eudes, N., Niederreither, K., Zaffran, S. and Bertrand, N.** (2016). Cardiac outflow morphogenesis depends on effects of retinoic acid signaling on multiple cell lineages. *Dev. Dyn.* **245**, 388-401.
- Etchevers, H.** (2011). Primary culture of chick, mouse or human neural crest cells. *Nat. Protoc.* **6**, 1568-1577.
- Etchevers, H., Couly, G., Vincent, C. and Le Douarin, N. M.** (1999). Anterior cephalic neural crest is required for forebrain viability. *Development* **126**, 3533-3543.
- Etchevers, H. C., Vincent, C., Le Douarin, N. M. and Couly, G. F.** (2001). The cephalic neural crest provides pericytes and smooth muscle cells to all blood vessels of the face and forebrain. *Development* **128**, 1059-1068.
- Etchevers, H. C., Amiel, J. and Lyonnet, S.** (2006). Molecular Bases of Human Neurocristopathies. In *Neural Crest Induction and Differentiation* (ed. J.-P. Saint-Jeannel), pp. 213-234. Boston, MA: Springer US; Landes Bioscience.
- Etchevers, H. C., Rose, C., Kahle, B., Vorbringer, H., Fina, F., Heux, P., Berger, I., Schwarz, B., Zaffran, S., Macagno, N. et al.** (2018). Giant congenital melanocytic nevus with vascular malformation and epidermal cysts associated with a somatic activating mutation in BRAF. *Pigment Cell Melanoma Res.* **31**, 437-441.
- Evans, A. L. and Gage, P. J.** (2005). Expression of the homeobox gene Pitx2 in neural crest is required for optic stalk and ocular anterior segment development. *Hum. Mol. Genet.* **14**, 3347-3359.
- Fernandes, K. J. L., McKenzie, I. A., Mill, P., Smith, K. M., Akhavan, M., Barnabé-Heider, F., Biernaskie, J., Juneak, A., Kobayashi, N. R., Toma, J. G. et al.** (2004). A dermal niche for multipotent adult skin-derived precursor cells. *Nat. Cell Biol.* **6**, 1082-1093.
- Frank, E. and Sanes, J. R.** (1991). Lineage of neurons and glia in chick dorsal root ganglia: analysis in vivo with a recombinant retrovirus. *Development* **111**, 895-908.
- Fraser, S. E. and Bronner-Fraser, M.** (1991). Migrating neural crest cells in the trunk of the avian embryo are multipotent. *Development* **112**, 913-920.
- Furlan, A. and Adameyko, I.** (2018). Schwann cell precursor: a neural crest cell in disguise? *Dev. Biol.*, S0012-1606(17)30852-7.

- Furlan, A., Dyachuk, V., Kastriiti, M. E., Calvo-Enrique, L., Abdo, H., Hadjab, S., Chontorotzea, T., Akkuratova, N., Usoskin, D., Kamenev, D. et al. (2017). Multipotent peripheral glial cells generate neuroendocrine cells of the adrenal medulla. *Science* **357**, eaal3753.
- Gage, P. J., Rhoades, W., Prucka, S. K. and Hjalt, T. (2005). Fate maps of neural crest and mesoderm in the mammalian eye. *Invest. Ophthalmol. Vis. Sci.* **46**, 4200-4208.
- Gallik, K. L., Treffy, R. W., Nacke, L. M., Ahsan, K., Rocha, M., Green-Saxena, A. and Saxena, A. (2017). Neural crest and cancer: divergent travelers on similar paths. *Mech. Dev.* **148**, 89-99.
- Gans, C. and Northcutt, R. G. (1983). Neural crest and the origin of vertebrates: a new head. *Science* **220**, 268-273.
- Gendron-Maguire, M., Mallo, M., Zhang, M. and Gridley, T. (1993). Hoxa-2 mutant mice exhibit homeotic transformation of skeletal elements derived from cranial neural crest. *Cell* **75**, 1317-1331.
- Giebel, L. B. and Spritz, R. A. (1991). Mutation of the KIT (mast/stem cell growth factor receptor) protooncogene in human piebaldism. *Proc. Natl. Acad. Sci. USA* **88**, 8696-8699.
- Goodwin, L. O., Splinter, E., Davis, T. L., Urban, R., He, H., Braun, R. E., Elissa, J., Kumar, V., Van Min, M. et al. (2017). Large-scale discovery of mouse transgenic integration sites reveals frequent structural variation and insertional mutagenesis. *Genome Res.*, gr.233866.117.
- Goronowitsch, N. (1892). Die axiale und die laterale Kopfmetamerie der Vögelembryonen. Die Rolle der sog.'Ganglienleisten' im Aufbaue der Nervenstämme. *Anat. Anz* **7**, 454-464.
- Goronowitsch, N. (1893). Untersuchungen über die Entwicklung der sog.'Ganglienleisten' im Kopfe der Vögelembryonen. *Morph. Jahrb. Bd* **20**, 187-259.
- Grenier, J., Teillet, M.-A., Grifone, R., Kelly, R. G. and Duprez, D. (2009). Relationship between neural crest cells and cranial mesoderm during head muscle development. *PLoS ONE* **4**, e4381.
- His, W. (1868). *Untersuchungen über die erste Anlage des Wirbelthierleibes: die erste Entwicklung des Hühnchens im Ei*. Leipzig: F.C.W. Vogel.
- Hofstra, R. M., Osinga, J., Tan-Sindhunata, G., Wu, Y., Kamsteeg, E. J., Stulp, R. P., van Ravenswaaij-Arts, C., Majoor-Krakauer, D., Angrist, M., Chakravarti, A. et al. (1996). A homozygous mutation in the endothelin-3 gene associated with a combined Waardenburg type 2 and Hirschsprung phenotype (Shah-Waardenburg syndrome). *Nat. Genet.* **12**, 445-447.
- Holmdahl, D. E. (1928). Die Entstehung und weitere Entwicklung der Neuralleiste (Ganglienleiste) bei Vögeln und Säugetieren. *Z. Mikrosk. Anat. Forsch.* **14**, 99-298.
- Hörstadius, S. (1950). *The neural crest: its properties and derivatives in the light of experimental research*. New York, London: Oxford University Press.
- Hörstadius, S. and Sellman, S. (1941). Experimental studies on the determination of the chondrocranium in *Amblystoma mexicanum*. *Ark. Zool. A* **33**, 1-8.
- Hörstadius, S. O. and Sellman, S. (1946). *Experimentelle Untersuchungen über die Determination des knorpeligen Kopfskellates bei Urodelen*. Almquist & Wiksell.
- Hosoda, K., Hammer, R. E., Richardson, J. A., Baynash, A. G., Cheung, J. C., Giaid, A. and Yanagisawa, M. (1994). Targeted and natural (piebald-lethal) mutations of endothelin-B receptor gene produce megacolon associated with spotted coat color in mice. *Cell* **79**, 1267-1276.
- Huang, L., Couto, J. A., Pinto, A., Alexandrescu, S., Madsen, J. R., Greene, A. K., Sahin, M. and Bischoff, J. (2017). Somatic GNAQ mutation is enriched in brain endothelial cells in sturge-weber syndrome. *Pediatr. Neurol.* **67**, 59-63.
- Ito, A. and Ito, K. (2006). Expression of chondrogenic potential of mouse trunk neural crest cells by FGF2 treatment. *Dev. Dyn.* **235**, 361-367.
- Isern, J., García-García, A., Martín, A. M., Arranz, L., Martín-Pérez, D., Torroja, C., Sánchez-Cabo, F. and Méndez-Ferrer, S. (2014). The neural crest is a source of mesenchymal stem cells with specialized hematopoietic stem cell niche function. *Elife* **3**, 1-28.
- Jiang, X., Rowitch, D. H., Soriano, P., McMahon, A. P. and Sucov, H. M. (2000). Fate of the mammalian cardiac neural crest. *Development* **127**, 1607-1616.
- Jiang, X., Iseki, S., Maxson, R. E., Sucov, H. M. and Morriss-Kay, G. M. (2002). Tissue origins and interactions in the mammalian skull vault. *Dev. Biol.* **241**, 106-116.
- Johnston, M. C. (1966). A radioautographic study of the migration and fate of cranial neural crest cells in the chick embryo. *Anat. Rec.* **156**, 143-155.
- Johnston, M. C., Noden, D. M., Hazelton, R. D., Coulombre, J. L. and Coulombre, A. J. (1979). Origins of avian ocular and periocular tissues. *Exp. Eye Res.* **29**, 27-43.
- Katschenko, N. (1888). Zur Entwicklungsgeschichte der Selachierembryos. *Anat. Anz.* **3**, 445-467.
- Kaukua, N., Shahidi, M. K., Konstantinidou, C., Dyachuk, V., Kaucka, M., Furlan, A., An, Z., Wang, L., Hultman, I., Ahrlund-Richter, L. et al. (2014). Glial origin of mesenchymal stem cells in a tooth model system. *Nature* **513**, 551-554.
- Kerosuo, L., Nie, S., Bajpai, R. and Bronner, M. E. (2015). Crestospheres: Long-term maintenance of multipotent, premigratory neural crest stem cells. *Stem Cell Rep.* **5**, 499-507.
- Kim, Y. J., Lim, H., Li, Z., Oh, Y., Kovlyagina, I., Choi, I. Y., Dong, X. and Lee, G. (2014). Generation of multipotent induced neural crest by direct reprogramming of human postnatal fibroblasts with a single transcription factor. *Cell Stem Cell* **15**, 497-506.
- Kinutani, M. and Le Douarin, N. M. (1985). Avian spinal cord chimeras. I. Hatching ability and posthatching survival in homo- and heterospecific chimeras. *Dev. Biol.* **111**, 243-255.
- Kirby, M. L., Gale, T. F. and Stewart, D. E. (1983). Neural crest cells contribute to normal aorticopulmonary septation. *Science* **220**, 1059-1061.
- Kléber, M., Lee, H.-Y., Wurdak, H., Buchstaller, J., Riccomagno, M. M., Ittner, L. M., Suter, U., Epstein, D. J. and Sommer, L. (2005). Neural crest stem cell maintenance by combinatorial Wnt and BMP signaling. *J. Cell Biol.* **169**, 309-320.
- Krings, T., Geibprasert, S., Luo, C. B., Bhattacharya, J. J., Alvarez, H. and Lasjaunias, P. (2007). Segmental neurovascular syndromes in children. *Neuroimaging Clin. N. Am.* **17**, 245-258.
- Lacerda-Pinheiro, S., Dimitrova-Nakov, S., Harichane, Y., Souyri, M., Petit-Cocault, L., Legrès, L., Marchadier, A., Baudry, A., Ribes, S., Goldberg, M. et al. (2012). Concomitant multipotent and unipotent dental pulp progenitors and their respective contribution to mineralised tissue formation. *Eur. Cells Mater.* **23**, 371-386.
- Lahav, R., Dupin, E., Lecoin, L., Glavieux, C., Champeval, D., Ziller, C. and Le Douarin, N. M. (1998). Endothelin 3 selectively promotes survival and proliferation of neural crest-derived glial and melanocytic precursors in vitro. *Proc. Natl. Acad. Sci. USA* **95**, 14214-14219.
- Landacre, F. L. (1921). The fate of the neural crest in the head of the urodeles. *J. Comp. Neurol.* **33**, 1-43.
- Le Douarin, N. M. (1969). Particularités du noyau interphasique chez la caille Japonaise (*Coturnix coturnix japonica*). *Bull. Biol. Fr. Belg.* **103**, 435-452.
- Le Douarin, N. (1971a). La structure du noyau interphasique chez différentes espèces d'oiseaux. *C. R. Acad. Sci. Hebd. Seances Acad. Sci. D.* **272**, 1402-1404.
- Le Douarin, N. (1971b). Etude ultrastructurale comparative du noyau interphasique chez la caille (*Coturnix coturnix japonica*) et le poulet (*Gallus gallus*) par la méthode de coloration régressive à l'EDTA. *C. R. Acad. Sci. Hebd. Seances Acad. Sci. D.* **272**, 2334-2337.
- Le Douarin, N. (1973). A biological cell labeling technique and its use in experimental embryology. *Dev. Biol.* **30**, 217-222.
- Le Douarin, N. (1982). *The Neural Crest*. 1st edn. Cambridge: Cambridge University Press.
- Le Douarin, N. and Kalcheim, C. (1999). *The Neural Crest*. 2nd edn. Cambridge, U.K.: Cambridge University Press.
- Le Douarin, N. and Le Lièvre, C. (1970). Demonstration de l'origine neurale des cellules calcitonine du corps ultimobranchial chez l'embryon de poulet. *C. R. Acad. Sci. Hebd. Seances Acad. Sci. D.* **270**, 2857-2860.
- Le Douarin, N. and Teillet, M.-A. (1971). Localisation, par la méthode des greffes inter-spécifiques, du territoire neural dont dérivent les cellules adrénales surrenaliennes chez l'embryon d'Oiseau. *C. R. Acad. Sci. Hebd. Seances Acad. Sci. D.* **272**, 481-484.
- Le Douarin, N. M. and Teillet, M. A. (1973). The migration of neural crest cells to the wall of the digestive tract in avian embryo. *J. Embryol. Exp. Morphol.* **30**, 31-48.
- Le Douarin, N. M. and Teillet, M. A. (1974). Experimental analysis of the migration and differentiation of neuroblasts of the autonomic nervous system and of neuroectodermal mesenchymal derivatives, using a biological cell marking technique. *Dev. Biol.* **41**, 162-184.
- Le Douarin, N., Le Lièvre, C. and Fontaine, J. (1972). Recherches expérimentales sur l'origine embryologique du corps carotidien chez les Oiseaux. *C. R. Acad. Sci. Hebd. Seances Acad. Sci. D.* **275**, 583-586.
- Le Douarin, N., Fontaine, J. and Le Lièvre, C. (1974). New studies on the neural crest origin of the avian ultimobranchial glandular cells—interspecific combinations and cytochemical characterization of C cells based on the uptake of biogenic amine precursors. *Histochemistry* **38**, 297-305.
- Le Douarin, N. M., Renaud, D., Teillet, M. A. and Le Douarin, G. H. (1975). Cholinergic differentiation of presumptive adrénergic neuroblasts in interspecific chimeras after heterotopic transplantations. *Proc. Natl. Acad. Sci. USA* **72**, 728-732.
- Le Douarin, N. M., Creuzet, S., Couly, G. and Dupin, E. (2004). Neural crest cell plasticity and its limits. *Development* **131**, 4637-4650.
- Le Douarin, N. M., Couly, G. and Creuzet, S. E. (2012). The neural crest is a powerful regulator of pre-otic brain development. *Dev. Biol.* **366**, 74-82.
- Lee, G., Kim, H., Elkabetz, Y., Al Shamy, G., Panagiotakos, G., Barberi, T., Tabar, V. and Studer, L. (2007). Isolation and directed differentiation of neural crest stem cells derived from human embryonic stem cells. *Nat. Biotechnol.* **25**, 1468-1475.
- Le Lièvre, C. and Le Douarin, N. (1973). Contribution du mésectoderme à la genèse des arcs aortiques chez l'embryon d'Oiseau [Role of mesectoderm in the genesis of aortic arches of the bird embryo]. *C. R. Acad. Sci. Hebd. Seances Acad. Sci. D.* **276**, 383-386.
- Le Lièvre, C. S. and Le Douarin, N. M. (1975). Mesenchymal derivatives of the neural crest: analysis of chimaeric quail and chick embryos. *J. Embryol. Exp. Morphol.* **34**, 125-154.

- Lewis, A. E., Vasudevan, H. N., O'Neill, A. K., Soriano, P. and Bush, J. O. (2013). The widely used Wnt1-Cre transgene causes developmental phenotypes by ectopic activation of Wnt signaling. *Dev. Biol.* **379**, 229-234.
- Liu, J. A. and Cheung, M. (2016). Neural crest stem cells and their potential therapeutic applications. *Dev. Biol.* **419**, 199-216.
- Maguire, L. H., Thomas, A. R. and Goldstein, A. M. (2015). Tumors of the neural crest: Common themes in development and cancer. *Dev. Dyn.* **244**, 311-322.
- Marshall, A. M. (1878). The development of the cranial nerves in the chick. *Q. J. Microsc. Sci.* **18**, 10-40.
- Martik, M. L. and Bronner, M. E. (2017). Regulatory logic underlying diversification of the neural crest. *Trends Genet.* **33**, 715-727.
- Matsuoka, T., Ahlberg, P. E., Kessar, N., Iannarelli, P., Dennehy, U., Richardson, W. D., McMahon, A. P. and Koentges, G. (2005). Neural crest origins of the neck and shoulder. *Nature* **436**, 347-355.
- McGonnell, I. M. and Graham, A. (2002). Trunk neural crest has skeletogenic potential. *Curr. Biol.* **12**, 767-771.
- McKinney, M. C., Fukatsu, K., Morrison, J., McLennan, R., Bronner, M. E. and Kulesa, P. M. (2013). Evidence for dynamic rearrangements but lack of fate or position restrictions in premigratory avian trunk neural crest. *Development* **140**, 820-830.
- McLennan, R., Schumacher, L. J., Morrison, J. A., Teddy, J. M., Ridenour, D. A., Box, A. C., Semerad, C. L., Li, H., McDowell, W., Kay, D. et al. (2015). VEGF Signals induce trailblazer cell identity that drives neural crest migration. *Dev. Biol.* **407**, 12-25.
- Menendez, L., Yatskivych, T. A., Antin, P. B. and Dalton, S. (2012). Wnt signaling and a Smad pathway blockade direct the differentiation of human pluripotent stem cells to multipotent neural crest cells. *Proc. Natl. Acad. Sci. USA* **109**, 9220-9220.
- Metcalfe, D. (2007). Hematopoietic stem cells and tissue stem cells: current concepts and unanswered questions. *Stem Cells* **25**, 2390-2395.
- Milet, C., Maczkowiak, F., Roche, D. D. and Monsoro-Burg, A. H. (2013). Pax3 and Zic1 drive induction and differentiation of multipotent, migratory, and functional neural crest in *Xenopus* embryos. *Proc. Natl. Acad. Sci. USA* **110**, 5528-5533.
- Morrison, S. J., White, P. M., Zock, C. and Anderson, D. J. (1999). Prospective identification, isolation by flow cytometry, and in vivo self-renewal of multipotent mammalian neural crest stem cells. *Cell* **96**, 737-749.
- Motohashi, T. and Kunisada, T. (2015). Extended multipotency of neural crest cells and neural crest-derived cells. *Curr. Top. Dev. Biol.* **111**, 69-95.
- Nagoshi, N., Shibata, S., Kubota, Y., Nakamura, M., Nagai, Y., Satoh, E., Morikawa, S., Okaja, Y., Mabuchi, Y., Katoh, H. et al. (2008). Ontogeny and multipotency of neural crest-derived stem cells in mouse bone marrow, dorsal root ganglia, and whisker pad. *Cell Stem Cell* **2**, 392-403.
- Nakano, K. E. and Nakamura, H. (1985). Origin of the irideal striated muscle in birds. *J. Embryol. Exp. Morphol.* **88**, 1-13.
- Nakashima, M., Miyajima, M., Sugano, H., Imura, Y., Kato, M., Tsurusaki, Y., Miyake, N., Saito, H., Arai, H. and Matsumoto, N. (2014). The somatic GNAQ mutation c.548G>A (p.R183Q) is consistently found in Sturge-Weber syndrome. *J. Hum. Genet.* **59**, 691-693.
- Noden, D. M. (1975). An analysis of the migratory behavior of avian cephalic neural crest cells. *Dev. Biol.* **42**, 106-130.
- Noden, D. M. (1978). The control of avian cephalic neural crest cytodifferentiation. I. Skeletal and connective tissues. *Dev. Biol.* **67**, 296-312.
- Northcutt, R. G. (2005). The new head hypothesis revisited. *J. Exp. Zool.* **304**, 274-297.
- Ohkubo, Y., Chiang, C. and Rubenstein, J. L. R. (2002). Coordinate regulation and synergistic actions of BMP4, SHH and FGF8 in the rostral prosencephalon regulate morphogenesis of the telencephalic and optic vesicles. *Neuroscience* **111**, 1-17.
- Oliveira, J. B., Bidere, N., Niemela, J. E., Zheng, L., Sakai, K., Nix, C. P., Danner, R. L., Barb, J., Munson, P. J., Puck, J. M. et al. (2007). NRAS mutation causes a human autoimmune lymphoproliferative syndrome. *Proc. Natl. Acad. Sci. USA* **104**, 8953-8958.
- Osumi-Yamashita, N., Ninomiya, Y., Doi, H. and Eto, K. (1994). The contribution of both forebrain and midbrain neural crest cells to the mesenchyme in the frontonasal mass of mouse embryos. *Dev. Biol.* **164**, 409-419.
- Othman-Hassan, K., Patel, K., Papoutsis, M., Rodriguez-Niedenführ, M., Christ, B. and Wilting, J. (2001). Arterial identity of endothelial cells is controlled by local cues. *Dev. Biol.* **237**, 398-409.
- Pearse, A. G., Polak, J. M., Rost, F. W., Fontaine, J., Le Lievre, C. and Le Douarin, N. (1973). Demonstration of the neural crest origin of type I (APUD) cells in the avian carotid body, using a cytochemical marker system. *Histochemie* **34**, 191-203.
- Pietri, T., Eder, O., Blanche, M., Thiery, J. P. and Dufour, S. (2003). The human tissue plasminogen activator-Cre mouse: a new tool for targeting specifically neural crest cells and their derivatives in vivo. *Dev. Biol.* **259**, 176-187.
- Pingault, V., Ente, D., Dastot-Le Moal, F., Goossens, M., Marlin, S. and Bondurand, N. (2010). Review and update of mutations causing Waardenburg syndrome. *Hum. Mutat.* **31**, 391-406.
- Platt, J. B. (1893). Ectodermic origin of the cartilages of the head. *Anat. Anz.* **8**, 506-509.
- Platt, J. B. (1897). The Development of the Cartilaginous Skull and of the Branchial and Hypoglossal Musculature in *Necturus*. *Morphol. Jahrb.* **25**, 377-464.
- Plouhinec, J.-L., Roche, D. D., Pegoraro, C., Figueiredo, A.-L., Maczkowiak, F., Brunet, L. J., Milet, C., Vert, J.-P., Pollet, N., Harland, R. M. et al. (2013). Pax3 and Zic1 trigger the early neural crest gene regulatory network by the direct activation of multiple key neural crest specifiers. *Dev. Biol.* **386**, 461-472.
- Polak, J. M., Pearse, A. G., Le Lièvre, C., Fontaine, J. and Le Douarin, N. M. (1974). Immunocytochemical confirmation of the neural crest origin of avian calcitonin-producing cells. *Histochemistry* **40**, 209-214.
- Pouget, C., Pottin, K. and Jaffredo, T. (2008). Sclerotomal origin of vascular smooth muscle cells and pericytes in the embryo. *Dev. Biol.* **315**, 437-447.
- Puffenberger, E. G., Hosoda, K., Washington, S. S., Nakao, K., DeWit, D., Yanagisawa, M. and Chakravart, A. (1994). A missense mutation of the endothelin-B receptor gene in multigenic Hirschsprung's disease. *Cell* **79**, 1257-1266.
- Rada-Iglesias, A., Bajpai, R., Prescott, S., Brugmann, S. A., Swigut, T. and Wysocka, J. (2012). Epigenomic annotation of enhancers predicts transcriptional regulators of human neural crest. *Cell Stem Cell* **11**, 633-648.
- Raible, D. W. and Eisen, J. S. (1994). Restriction of neural crest cell fate in the trunk of the embryonic zebrafish. *Development* **120**, 495-503.
- Raven, C. P. (1931). Zur entwicklung der Ganglienleiste. I. Die Kinematik der Ganglienleistenentwicklung bei den Urodelen. *Wilhelm Roux. Arch. Entwickl. Mech. Org.* **125**, 210-292.
- Raven, C. P. (1935). Zur Entwicklung der Ganglienleiste. IV: Untersuchungen über Zeitpunkt und Verlauf der "materiellen Determination" des präsumptiven Kopfganglienleistenmaterials der Urodelen. *Wilhelm Roux. Arch. Entwickl. Mech. Org.* **132**, 509-575.
- Rijli, F. M., Mark, M., Lakkaraju, S., Dierich, A., Dollé, P. and Chambon, P. (1993). A homeotic transformation is generated in the rostral branchial region of the head by disruption of *Hoxa-2*, which acts as a selector gene. *Cell* **75**, 1333-1349.
- Rinon, A., Molchadsky, A., Nathan, E., Yovel, G., Rotter, V., Sarig, R. and Tzahor, E. (2011). p53 coordinates cranial neural crest cell growth and epithelial-mesenchymal transition/delamination processes. *Development* **138**, 1827-1838.
- Sanchez-Martin, M., Rodriguez-Garcia, A., Perez-Losada, J., Sagrera, A., Read, A. P. and Sanchez-Garcia, I. (2002). SLUG (SNAI2) deletions in patients with Waardenburg disease. *Hum. Mol. Genet.* **11**, 3231-3236.
- Sauer, B. and Henderson, N. (1988). Site-specific DNA recombination in mammalian cells by the Cre recombinase of bacteriophage P1. *Proc. Natl. Acad. Sci. USA* **85**, 5166-5170.
- Sauer, M. E. and Walker, B. E. (1959). Radioautographic Study of Interkinetic Nuclear Migration in the Neural Tube. *Exp. Biol. Med.* **101**, 557-560.
- Sauka-Spengler, T. and Bronner-Fraser, M. (2008). Evolution of the neural crest viewed from a gene regulatory perspective. *Genesis* **46**, 673-682.
- Schilling, T. F. and Kimmel, C. B. (1994). Segment and cell type lineage restrictions during pharyngeal arch development in the zebrafish embryo. *Development* **120**, 483-494.
- Serbedzija, G. N., Fraser, S. E. and Bronner-Fraser, M. (1990). Pathways of trunk neural crest cell migration in the mouse embryo as revealed by vital dye labelling. *Development* **108**, 605-612.
- Serbedzija, G. N., Bronner-Fraser, M. and Fraser, S. E. (1992). Vital dye analysis of cranial neural crest cell migration in the mouse embryo. *Development* **116**, 297-307.
- Serbedzija, G. N., Bronner-Fraser, M. and Fraser, S. E. (1994). Developmental potential of trunk neural crest cells in the mouse. *Development* **120**, 1709-1718.
- Sidman, R. L., Miale, I. L. and Feder, N. (1959). Cell proliferation and migration in the primitive ependymal zone; An autoradiographic study of histogenesis in the nervous system. *Exp. Neurol.* **1**, 322-333.
- Sieber-Blum, M. and Cohen, A. M. (1980). Clonal analysis of quail neural crest cells: they are pluripotent and differentiate in vitro in the absence of noncrest cells. *Dev. Biol.* **80**, 96-106.
- Simoës-Costa, M. and Bronner, M. E. (2015). Establishing neural crest identity: a gene regulatory recipe. *Development* **142**, 242-257.
- Steel, K. P. and Barkway, C. (1989). Another role for melanocytes: their importance for normal stria vascularis development in the mammalian inner ear. *Development* **107**, 453-463.
- Stemple, D. L. and Anderson, D. J. (1992). Isolation of a stem cell for neurons and glia from the mammalian neural crest. *Cell* **71**, 973-985.
- Stone, L. S. (1922). Experiments on the development of the cranial ganglia and the lateral line sense organs in *Amblystoma punctatum*. *J. Exp. Zool. Part A Ecol. Genet. Physiol.* **35**, 420-496.
- Stone, L. S. (1926). Further experiments on the extirpation and transplantation of mesectoderm in *Amblystoma punctatum*. *J. Exp. Zool.* **44**, 95-131.
- Takahashi, M., Iwashita, T., Santoro, M., Lyonnet, S., Lenoir, G. M. and Billaud, M. (1999). Co-segregation of MEN2 and Hirschsprung's disease: the same mutation of RET with both gain and loss-of-function? *Hum. Mutat.* **13**, 331-336.

- Takakubo, F., Ikeda, Y. and Eto, K.** (1986). Stage-specific response of the mesenchyme to excess vitamin A in developing rat facial processes. *J. Craniofac. Genet. Dev. Biol.* **6**, 41-51.
- Tan, S. S. and Morriss-Kay, G. M.** (1986). Analysis of cranial neural crest cell migration and early fates in postimplantation rat chimaeras. *J. Embryol. Exp. Morphol.* **98**, 21-58.
- Teillet, M. A. and Le Douarin, N.** (1970). La migration des cellules pigmentaires étudiée par la méthode des greffes hétérospécifiques de tube nerveux chez l'embryon d'oiseau. [The migration of pigmentary cells studies by the method of heterospecific grafts of neural tube in bird embryo]. *C. R. Acad. Sci. Hebd. Seances Acad. Sci. D.* **270**, 3095-3098.
- Temple, S.** (1989). Division and differentiation of isolated CNS blast cells in microculture. *Nature* **340**, 471-473.
- Theveneau, E. and Mayor, R.** (2012). Neural crest delamination and migration: from epithelium-to-mesenchyme transition to collective cell migration. *Dev. Biol.* **366**, 34-54.
- Thomas, S., Thomas, M., Wincker, P., Babarit, C., Xu, P., Speer, M. C., Munnich, A., Lyonnet, S., Vekemans, M. and Etchevers, H. C.** (2008). Human neural crest cells display molecular and phenotypic hallmarks of stem cells. *Hum. Mol. Genet.* **17**, 3411-3425.
- Till, J. E. and McCulloch, E. A.** (1961). A direct measurement of the radiation sensitivity of normal mouse bone marrow cells. *Radiat. Res.* **14**, 213-222.
- Trentin, A., Glavieux-Pardanaud, C., Le Douarin, N. M. and Dupin, E.** (2004). Self-renewal capacity is a widespread property of various types of neural crest precursor cells. *Proc. Natl. Acad. Sci. USA* **101**, 4495-4500.
- Twitty, V. C. and Bodenstein, D.** (1941). Experiments on the determination problem I. The roles of ectoderm and neural crest in the development of the dorsal fin in Amphibia. II. Changes in ciliary polarity associated with the induction of fin epidermis. *J. Exp. Zool.* **86**, 343-380.
- Uesaka, T., Young, H. M., Pachnis, V. and Enomoto, H.** (2016). Development of the intrinsic and extrinsic innervation of the gut. *Dev. Biol.* **417**, 158-167.
- van Rooijen, E., Fazio, M. and Zon, L. I.** (2017). From fish bowl to bedside: The power of zebrafish to unravel melanoma pathogenesis and discover new therapeutics. *Pigment Cell Melanoma Res.* **30**, 402-412.
- Vega-Lopez, G. A., Cerrizuela, S., Tribulo, C. and Aybar, M. J.** (2018). Neurocristopathies: New insights 150 years after the neural crest discovery. *Dev. Biol.*, S0012-1606(17)30838-2.
- von Baer, K. E.** (1828). *Über Entwicklungsgeschichte der Thiere. Beobachtung und Reflexion*. Königsberg: Gebrüder Borntraeger Verlagsbuchhandlung.
- Waldo, K., Miyagawa-Tomita, S., Kumiski, D. and Kirby, M. L.** (1998). Cardiac neural crest cells provide new insight into septation of the cardiac outflow tract: aortic sac to ventricular septal closure. *Dev. Biol.* **196**, 129-144.
- Watt, K. E. N. and Trainor, P. A.** (2014). Neurocristopathies: the etiology and pathogenesis of disorders arising from defects in neural crest cell development. In *Neural Crest Cells: Evolution Development and Disease* (ed. P. Trainor), pp. 361-394. Academic Press.
- Weston, J. A.** (1963). A radioautographic analysis of the migration and localization of trunk neural crest cells in the chick. *Dev. Biol.* **6**, 279-310.
- White, R. M., Cech, J., Ratanasirintrawoot, S., Lin, C. Y., Rahl, P. B., Burke, C. J., Langdon, E., Tomlinson, M. L., Mosher, J., Kaufman, C. et al.** (2011). DHODH modulates transcriptional elongation in the neural crest and melanoma. *Nature* **471**, 518-522.
- Willmore-Payne, C., Holden, J. A., Tripp, S. and Layfield, L. J.** (2005). Human malignant melanoma: detection of BRAF- and c-kit-activating mutations by high-resolution amplicon melting analysis. *Hum. Pathol.* **36**, 486-493.
- Wong, C. E., Paratore, C., Dours-Zimmermann, M. T., Rochat, A., Pietri, T., Suter, U., Zimmermann, D. R., Dufour, S., Thiery, J. P., Meijer, D. et al.** (2006). Neural crest-derived cells with stem cell features can be traced back to multiple lineages in the adult skin. *J. Cell Biol.* **175**, 1005-1015.
- Yamauchi, Y., Abe, K., Mantani, A., Hitoshi, Y., Suzuki, M., Osuzu, F., Kuratani, S. and Yamamura, K.** (1999). A novel transgenic technique that allows specific marking of the neural crest cell lineage in mice. *Dev. Biol.* **212**, 191-203.
- Yntema, C. L. and Hammond, W. S.** (1955). Experiments on the origin and development of the sacral autonomic nerves in the chick embryo. *J. Exp. Zool.* **129**, 375-413.
- Zaffran, S., Odelin, G., Stefanovic, S., Lescroart, F. and Etchevers, H. C.** (2018). Ectopic expression of Hoxb1 induces cardiac and craniofacial malformations. *Genesis* **56**, e23221.
- Zeltner, N., Fattahi, F., Dubois, N. C., Saurat, N., Lafaille, F., Shang, L., Zimmer, B., Tchieu, J., Soliman, M. A., Lee, G. et al.** (2016). Capturing the biology of disease severity in a PSC-based model of familial dysautonomia. *Nat. Med.* **22**, 1421-1427.
